# ShuTu: Open-Source Software for Efficient and Accurate Reconstruction of Dendritic Morphology

Dezhe Z. Jin<sup>1\*</sup>, Ting Zhao<sup>2</sup>, David Hunt<sup>2</sup>, Rachel Pearcy<sup>2</sup>, Ching-Lung Hsu<sup>2</sup>, Nelson Spruston<sup>2\*</sup>

1 Department of Physics and Center for Neural Engineering, the Pennsylvania State University, University Park, Pennsylvania, U.S.A

2 Janelia Research Campus, Howard Hughes Medical Institute, Ashburn, Virginia, U.S.A

\* Corresponding authors: Dezhe Z. Jin, dzj2@psu.edu, Nelson Spruston, sprustonn@janelia.hhmi.org

*Abbreviated title:* ShuTu

*Number of pages:* 70

*Number of figures:* 16

*Number of words in Abstract:* 169

*Number of words in Significance Statement:* 43

*Number of words for Introduction:* 611

*Number of words for Discussion:* 1074

*Conflict of Interest:* The authors declare no competing financial interests.

*Acknowledgements:* Research for D.Z.J was supported by the Visiting Scientist Program at the Janelia Research Campus, Howard Hughes Medical Institute; and by the Huck Institute of Life Sciences at the Pennsylvania State University.

## 1 **Abstract**

2 Neurons perform computations by integrating inputs from thousands of synapses – mostly in the  
3 dendritic tree – to drive action potential firing in the axon. One fruitful approach to understand-  
4 ing this process is to record from neurons using patch-clamp electrodes, fill the recorded neuron  
5 with a substance that allows subsequent staining, reconstruct the three-dimensional architec-  
6 ture of the dendrites, and use the resulting functional and structural data to develop computer  
7 models of dendritic integration. Accurately producing quantitative reconstructions of dendrites  
8 is typically a tedious process taking many hours of manual inspection and measurement. Here  
9 we present ShuTu, a new software package that facilitates accurate and efficient reconstruction  
10 of dendrites imaged using bright-field microscopy. The program operates in two steps: (1) auto-  
11 mated identification of dendritic process, and (2) manual correction of errors in the automated  
12 reconstruction. This approach allows neurons with complex dendritic morphologies to be recon-  
13 structed rapidly and efficiently, thus facilitating the use of computer models to study dendritic  
14 structure-function relationships and the computations performed by single neurons.

## 15 **Significance Statement**

16 We developed a software package – ShuTu – that integrates automated reconstruction of stained  
17 neurons with manual error correction. This package facilitates rapid reconstruction of the three-  
18 dimensional geometry of neuronal dendritic trees, often needed for computational simulations  
19 of the functional properties of these structures.

## 20 Introduction

21 The geometry of dendritic arbors directly influences synaptic integration and the resultant firing  
22 patterns of neurons (Mainen and Sejnowski, 1996; Henze et al., 1996; Stuart and Spruston, 1998;  
23 Krichmar et al., 2002). Dendritic morphologies vary widely across and within regions of the  
24 brain (Parekh and Ascoli, 2013), so consideration of morphology is an important aspect of  
25 understanding the mechanisms by which different neurons carry out their unique functions.  
26 Intracellular recording of neurons is a common technique for studying dendritic integration  
27 of input signals (Hamill et al., 1981; Stuart and Spruston, 1998). To fully understand the  
28 implications of these experiments, numerical simulations of the recorded neurons are often needed  
29 (Jaeger, 2001; Krichmar et al., 2002; Gidon and Segev, 2012; Menon et al., 2013). Informative  
30 simulations require accurate reconstructions of the geometry of the recorded neurons, including  
31 branching structures and diameters of the branches.

32 The traditional method of reconstructing neuron morphology requires intensive human labor  
33 (Zandt et al., 2017). A slide containing a neuron filled with biocytin is mounted on a motorized  
34 stage and imaged using a video camera mounted to a bright-field microscope. The neuron image  
35 is displayed on a computer screen, and the reconstruction is done manually. The user clicks the  
36 mouse along the images of dendritic branches on the screen. While clicking, the user adjusts the  
37 cursor size to match the diameters, and turns the z-position knob on the microscope to keep the  
38 branches in focus. Each click records the  $x$ ,  $y$ , and  $z$  positions and the radius  $r$  at a single point,  
39 and connects the point to the previously clicked point. Bifurcations are marked and followed up  
40 sequentially. The morphology is recorded in a series of these clicked points.

41 Manual reconstruction in this way is computationally straightforward. Since it requires no  
42 image storage or processing, the computational demand is minimal. However, there are several  
43 drawbacks, especially when the accuracy of reconstruction is crucial. Repetitive clicking while  
44 measuring the radii and turning the focus knob makes manual reconstruction labor-intensive  
45 and time-consuming. The problem is exacerbated at high magnification. To see fine processes  
46 of neurons, it is desirable to image neurons with an objective at 100X magnification and a large

47 numerical aperture (Jaeger, 2001; Brown et al., 2011). In our experience, however, it can take  
48 10 - 15 hours or more of continuous work to reconstruct the dendritic tree of a pyramidal neuron  
49 in this way. Over this period of time, instability of the sample in the microscope can lead  
50 to problems. Furthermore, the accuracy of the reconstruction can suffer from fatigue-induced  
51 mistakes. Another problem with manual reconstruction is that the accuracy is hard to check  
52 independently because it is difficult to precisely align the previous reconstruction with the neuron  
53 image after remounting the slide.

54 Automatic reconstruction of neuron morphology using computer algorithms promises to  
55 reduce manual labor and increase productivity. There have been intensive efforts towards this  
56 goal, including open-source projects such as the Digital Reconstruction of Axonal and Dendritic  
57 Morphology Challenge (DIADEM)(Liu, 2011; Svoboda, 2011; Gillette et al., 2011; Gillette et  
58 al., 2011) and the BigNeuron project (Peng et al., 2015). Commercial software is also moving in  
59 this direction. In our experience, however, available software suffered from a variety of problems,  
60 including limited automation and tedious approaches for error correction. Thus, we sought to  
61 develop an open-source software platform that would overcome these limitations. In this paper,  
62 we describe our open-source software package, ShuTu (Chinese for “dendrite”) – a system for  
63 reconstructing biocytin-filled neurons efficiently and accurately. To avoid the impression of  
64 marketing our software, we make no attempt to compare it to other open-source or commercial  
65 software; instead, we encourage others to try it and judge for themselves.

## 66 **Results**

67 We demonstrate the use of ShuTu by going through the steps involved in reconstructing a single  
68 CA3 pyramidal neuron from a mouse hippocampal slice. We then present reconstruction results  
69 for other cell types as well. All neurons were stained following patch-clamp recordings in brain  
70 slices prepared from 17-30 day-old male mice (C57Bl/6), using biocytin-containing intracellular  
71 solution. Following recording and staining, neuron reconstruction proceeded according to the  
72 following steps: (1) image acquisition; (2) image processing; (3) automated reconstruction; (4)

73 manual editing and error correction. Additional details regarding slice recordings and computer  
74 systems requirements are provided in the Materials and Methods section. Operational commands  
75 for ShuTu are provided in Appendix 1. Technical details regarding the algorithms used in ShuTu  
76 are provided in Appendix 2.

## 77 **Image acquisition**

78 ShuTu uses tiles of tiff stacks covering the entire neuron (Fig. 1). Nearby tiles should overlap  
79 by  $\sim 20\%$ , in order to facilitate accurate stitching of tiles into a single image. We imaged hip-  
80 pocampal neurons using a Zeiss AxioImager microscope with AxioCam and ZEN blue software.  
81 Once the boundary in the field of view ( $xy$ ) and the range of the depths ( $z$ ) that contain the  
82 neuron were set, the images at each tile position and depth were acquired automatically, and  
83 the positions of the these images were stored in an xml file (image metadata). Other micro-  
84 scope/software combinations can be used, as long as tiff stacks and their relative positions are  
85 provided to ShuTu (see Materials and Methods for details). It is also possible to use ShuTu to  
86 reconstruct neurons imaged using two-photon, confocal, or wide-field fluorescence microscopy  
87 (see Discussion). However, we have restricted our use of the software to neurons stained using  
88 biocytin and a dark reaction product.

89 The number of images required to capture the full three-dimensional (3D) morphology of a  
90 neuron depends on its size and the magnification of the microscope objective. The CA3 pyra-  
91 midal neuron reconstructed here was relatively large and we imaged it using 100X objective  
92 (NA 1.4) (Fig. 1). A total of 51 tiles was required, with 224 images per tile (0.5  $\mu\text{m}$  increments  
93 through the depth of the slice), thus yielding a total of 11,424 images. This neuron is contained  
94 in a volume of  $\sim 400 \times 600 \times 100 \mu\text{m}^3$  and has a total dendritic length of  $\sim 8815 \mu\text{m}$ . The  
95 full imaging process for the CA3 pyramidal neuron took approximately 2 hours on the Zeiss  
96 microscope system we used. Faster imaging times (and fewer tiles) can be accomplished using  
97 lower magnification objectives, but in our experience 100X provides more accurate estimates  
98 of diameters for small-caliber dendrites. During imaging, care was taken to ensure that the

99 microscope settings were optimized to obtain images of all dendrites, including those with the  
100 smallest diameter. This resulted in significant background noise, which was removed automati-  
101 cally in a final step of the reconstruction process (see below). We made no attempt to image or  
102 reconstruct axons, as these were of finer caliber than dendrites and for many neurons they were  
103 difficult to discern beyond a short distance from their origin near the soma.

## 104 **Image processing**

105 Because the ZEN blue microscope software provides individual images files for each tile in each  
106 image plane, ShuTu first converts the image files into tiff stacks using the image metadata  
107 file (xml) and parsing the file names for depth information. Each tile was imaged successively  
108 through the depth of the slice, so no alignment of the images is required to form a stack. As each  
109 stack consists of 224 images, about five minutes of CPU time was required for each stack (see  
110 Materials and Methods for the system used). The CA3 pyramidal neuron reconstructed here  
111 consists of 51 tiles, for a total of just over four hours. With multiple CPU cores and sufficient  
112 memory, ShuTu can automatically distribute the task across multiple cores in parallel, resulting  
113 in approximately linear reduction in the real time required to construct the stacks.

114 After the tiff stacks are created, the tiles need to be stitched to find precise relative positions  
115 between the tiles. ShuTu also accomplishes this task in a parallel manner, requiring a similar  
116 amount of computational time as construction of the stacks. These two image processing steps  
117 are performed in series, but they can be executed sequentially without user intervention. In the  
118 case of our example CA3 pyramidal neuron, both of these steps were performed in just a few  
119 hours by using multiple CPU cores.

## 120 **Automated reconstruction**

121 After image processing, ShuTu produces a draft reconstruction of the neuron using an automatic  
122 reconstruction algorithm (Materials and Methods). We devised the algorithm to specifically deal  
123 with several challenges posed by the bright-field images of biocytin-filled neurons (Fig. 2). One

124 is background noise (Fig. 2a). While patching a neuron, biocytin can spill out and create large  
125 blobs in the image stacks. Dirt or dust can be picked up, resulting in structures that look like  
126 neurites, especially when color information is not used. Second, during the process of fixing the  
127 tissue, thin dendrites can become beaded, with very faint signals between the beads (Fig. 2b).  
128 Third, close crossings of adjacent branches requires special attention to resolve (Fig. 2c). Fourth,  
129 shadows of out-of-focus branches can be as strong as signals from thin dendrites in focus (Fig. 2d),  
130 making it hard to trace some dendrites without being fooled by the shadows. These challenges  
131 make it difficult to create a perfect reconstruction from automated algorithms. Our algorithm  
132 is designed to address many of these issues, but some manual correction is ultimately required.  
133 In the following, we outline the steps involved in the algorithm, using the tile shown in Fig. 1b  
134 as an example. Technical details of the algorithm are presented in Appendix 2, which should be  
135 useful for adjusting the parameters for specific situations encountered by users.

### 136 **Conversion to gray scale and 2D projection**

137 The color images are converted into grayscale images. A minimum intensity projection of the  
138 tiff stack is then created, which has the same dimension as a single 2D plane in the stack.  
139 The intensity at each pixel is chosen to be that of the darkest pixel among all pixels in the  
140 stack having the same  $xy$  position. This minimum intensity projection reveals all neurites in  
141 the tiff stack (Fig. 3a), along with noise from the sources mentioned above. To remove smooth  
142 variations due to uneven lighting, the 2D projection is blurred by Gaussian smoothing (Fig. 3b)  
143 and subtracted from the original 2D projection (Fig. 3c). Additionally, this process makes faint  
144 branches nearly as visible as well-stained ones (Fig. 3d); the inverse peaks corresponding to the  
145 branches in the intensity profile have more even heights after the background removal (purple  
146 curve) than before (green curve).

## 147 **Binary mask**

148 The 2D projection is used to create a mask, which is a binary image with the white pixels  
149 indicating the neurites and dark pixels the background (Fig. 3e-i). An accurate mask is crucial for  
150 our reconstruction algorithm. Considering the intensity as heights, the neurites in the original 2D  
151 projection can be viewed as meandering valleys of dark pixels. To create the mask, we evaluate  
152 the possibility that each pixel in the 2D projection belongs to a valley. This is accomplished  
153 by comparing the local patch of image centered at the pixel with valley detectors of varying  
154 orientations (Fig. 3e) (Frangi et al., 1998). A valley detector is a 2D image consisting of an  
155 oriented dark band flanked by two bright bands. The response of the detector is the sum of the  
156 products of the corresponding pixels in the detector and the local patch (Fig. 3f). The response  
157 has a maximum ( $\lambda_1$ ) at one orientation, and a minimum ( $\lambda_2$ ) at the orthogonal orientation  
158 (Fig. 3f). If the local patch is nearly uniform in intensity, the response is close to zero at all  
159 orientations, and  $\lambda_1$  is small (Fig. 3f, blue curve, which describes the responses at the blue pixel  
160 in Fig. 3c). In contrast, if the local patch contains a valley, the maximum response ( $\lambda_1$ ) is large  
161 and the minimum response ( $\lambda_2$ ) is small (Fig. 3f, red curve, at the red pixel in Fig. 3c). If the  
162 patch contains a crater corresponding to a blob,  $\lambda_1$  can be large, but so can  $\lambda_2$ , because there  
163 is no privileged orientation. These insights are used to select pixels in valleys but not in blobs  
164 or in the background through thresholding  $\lambda_1$  while also factoring in the difference between  $\lambda_1$   
165 and  $\lambda_2$ , creating the binary mask (Fig. 3h). The mask is further smoothed to eliminate noisy  
166 speckles and rough edges in the boundaries, creating the smoothed mask (Fig. 3i).

## 167 **SWC points**

168 The mask is used to place SWC points along the neurites. The SWC points are placed along  
169 the centerlines of the binary mask (Fig. 4a). The radii of the SWC points are computed as  
170 the shortest distance to the nearest boundaries (Fig. 4b). To determine the depths of the SWC  
171 points in the original tiff stack, we dissect the centerlines into segments between end points  
172 and/or crossing points. These segments are called ‘xy-paths’ (e.g., Fig. 4a, red arrow). Cutting



173 through the tiff stack while following an  $xy$ -path, we create a ‘z-image’ for that segment (Fig. 4c).  
174 This z-image contains all pixels in the tiff stack whose  $xy$  positions lie in the  $xy$ -path. The branch  
175 whose 2D projection falls on the  $xy$ -path manifests as a dark valley in the z-image spanning from  
176 the left edge to the right edge (Fig. 4c). ShuTu finds the line through the dark valley (red dotted  
177 line in Fig. 4c), from which the depths of the neurites (and the SWC points) are determined. The  
178 distance between successive SWC points is set to roughly the sum of their radii. The distance  
179 is made shorter when the radii changes rapidly along the centerlines to reflect large changes in  
180 short distances in the dendritic morphology.

181 Invalid SWC points are automatically removed (see below regarding validity of SWC points),  
182 and adjacent SWC points along one  $xy$ -path are connected. If the removal creates a large  
183 distance between two consecutive SWC points, they are not connected. Biologically, sharp turns  
184 in neurites are rare. Therefore, to safeguard against possible errors, we do not connect SWC  
185 points if doing so creates sharp angles in consecutive lines of connections. To avoid connecting  
186 branches far away in depth, SWC points are not connected if the difference in  $z$  is too large.  
187 These decisions depend on parameters set by the user (Appendix 2).

### 188 **Validity of SWC points**

189 In some cases, the  $xy$ -paths from the centerlines of the binary mask are incorrect. For example,  
190 nearby branches can be merged in the mask. Checking the validity of the SWC points is thus  
191 crucial for eliminating mistakes. To check the validity of an SWC point, we use the image at  
192 the plane of the SWC point, and create intensity profiles in eight directions centered at the  
193 SWC point (Fig. 5a). For each profile, we look for a significant inverse peak after smoothing  
194 the profile (Fig. 5b-c). The significance is checked against fluctuations in the intensity. To do  
195 so, we select all points in the smoothed profile with values above the median, which contains  
196 mostly the parts of the profile in the background, and compute the standard deviation  $\sigma$  of  
197 the differences between the smoothed and the original profile for the selected points (Fig. 5b,  
198 green and black curves, respectively). A threshold, set to the median minus  $\sigma$  (Fig. 5b, dotted

199 gray line), is used to judge whether the smoothed profile has two flanks. Another threshold, set  
200 to the median minus  $15\sigma$ , is used to judge whether the inverse peak is deep enough (Fig. 5b,  
201 gray line). If both criteria are met, the profile is judged to have a significant inverse peak. The  
202 width of the inverse peak is the distance between the steepest descending point and the steepest  
203 ascending point of the peak, identified by the derivatives of the smooth profile (Fig. 5e-f).

204 If none of the profiles have a significant inverse peak, the SWC point is invalid. Otherwise,  
205 we chose the profile with the minimum width among the valid ones. In some cases, an SWC  
206 point can be at the edge of thick dendrite or soma (see below). To eliminate them, we check  
207 whether the intensity with the half radius of the SWC point is low enough (Fig. 5d). Specifically,  
208 we check that the intensity values of the smoothed profile (Fig. 5d, violet curve) orthogonal to  
209 the chosen profile (Fig. 5d, green curve) within the half radius (Fig. 5d, dotted vertical lines) is  
210 smaller than a threshold. This threshold is set to the maximum of the chosen profile within the  
211 range plus  $\sigma$ . If not dark enough, the SWC point is invalid.

212 If the SWC point passes the validity test, we set its radius to the half width of the inverse  
213 peak in the chosen profile. Its  $xy$  position is adjusted to that of the inverse peak. To ensure that  
214 this adjusting process converges, we adjust each SWC point three times iteratively. If the final  
215  $xy$  position shifts from the original position more than twice of the original radius, we mark the  
216 SWC point invalid since it is most likely created erroneously. Finally, if the final radius of the  
217 SWC is smaller than  $0.2 \mu\text{m}$  or larger than  $10 \mu\text{m}$ , the SWC is most likely due to noise and is  
218 marked invalid.

## 219 **Mark pixels occupied**

220 As the SWC points are created, we mark pixels in the tiff stack in the vicinity of the SWC  
221 points as occupied (Fig. 6). Before creating a new SWC point, we check whether its center point  
222 is marked as occupied. If so, no SWC point is created. This avoids creating redundant SWC  
223 points for the same piece of dendritic branch.

## 224 **Thick dendrites and soma**

225 The widths of dendrites can vary by as much as five times from the thin terminal dendrites to  
226 the thick apical dendrite near the soma. The thick dendrites and the soma can be missing from  
227 the binary mask, which is created with the valley detector tuned for detecting thin dendrites.  
228 Instead, only edges of the thick dendrite and soma are captured in the mask, leading to invalid  
229 SWC points that are eliminated. To solve this issue, we specifically detect the presence of thick  
230 dendrites and soma. The thick dendrites and soma are typically well-stained and show up as  
231 darkest parts in the 2D projection. We use this fact to decide whether there are thick dendrites  
232 and soma that are not been covered by existing SWC points. If the lowest intensities in the  
233 pixels covered by the existing SWC points are brighter than the lowest intensities in the 2D  
234 projection, we decide that the binary mask missed the soma or thick dendrite. We create a  
235 binary mask on a 2D projection, excluding pixels around the existing SWC points. New SWC  
236 points are added based on this mask.

## 237 **Extending SWC points in 3D**

238 Gaps in the SWC structure can create broken representations of a continuous dendritic branch.  
239 They occur due to errors in the 2D projection representing the 3D branch structures, either  
240 because of weak signals or because of occlusions produced by crossing or nearby branches. To  
241 bridge these gaps, we extend the SWC points in 3D (the tiff stack) from the end points in the  
242 SWC structure.

243 To minimize the interference from noise, we first delete isolated SWC points that are not  
244 connected to any other SWC points. We then mark pixels nearby the existing SWC points  
245 occupied (red circles, Fig. 7a) to ensure that the extension does not create duplicated SWC  
246 points. From an end SWC point (yellow circle, Fig. 7a), we search for the next candidate SWC  
247 point. The search is done in a ring area centered at and in the plane of the end point. The search  
248 is also restrict to the pixels from which the lines to the end point (black lines, Fig. 7a) form  
249 angles smaller than  $\pi/3$  to the line from the end point to its connected SWC point (yellow line,

250 Fig. 7a). The arc is divided into 64 points, and a profile is built using the shortest intensity-  
251 weighted distances from these points to the end points (black line, Fig. 7b). The profile is  
252 smoothed (green line, Fig. 7b). and the  $xy$  position of its minimum is set as the  $xy$  position  
253 of the candidate SWC point. To find  $z$  of the candidate SWC point, we build the profile of  
254 intensity in  $z$ , smooth it, and find the position of its minimum (Fig. 7c).

255 We test the validity of the candidate SWC point, during which the  $xy$  position and radius  
256 are adjusted. If accepted, the extension process continues from the new SWC point as the end  
257 point. If the candidate point is marked occupied, the extension stops. After the extension stops,  
258 the end SWC point is connected to the nearest SWC point if the difference in  $z$  is smaller than  
259 two times the sum of their radii.

## 260 **Connecting end points**

261 After extending SWC points in 3D, a continuous branch can still be represented with broken  
262 segments of SWC points, especially if the underlying signal is broken or there are closely crossing  
263 branches (e.g., Fig. 2b,c). We connect these segments with heuristic rules based on the distances  
264 between the end points, in order to recover the branch continuity (Appendix 2). After connecting  
265 the end points, the SWC structure for the tiff stack is complete.

266 The results for our example tiff stack are shown in Fig. 8, in which the SWC points are  
267 overlaid with the underlying image, and in Fig. 9, in which the SWC structure is shown in four  
268 different view angles in 3D to reveal more details. For this particular tiff stack, the automated  
269 reconstruction is complete and accurate. In other cases, however, errors remain, which need to  
270 be corrected manually (see below).

## 271 **Subdivision in $z$**

272 The 2D projection can be complicated when there are many branches in one tiff stack, which  
273 often leads to missed branches due to occlusions. One way of mitigating this problem is to divide  
274 the tiff stack in  $z$  into several slabs with equal heights in  $z$ . SWC points are created separately

275 for each slab as described above, and then combined for the entire stack. The extension from the  
276 end points is done with the entire stack. When branches extend across the boundaries between  
277 subdivisions of tiff stacks, they are automatically connected by extension from the end points,  
278 as described above.

279 ShuTu allows the user to decide how many subdivisions are necessary based on the complexity  
280 of the morphology and the thickness of the tiff stacks. The user should keep in mind that a large  
281 number of subdivision slows down the automated tracing. In our example neuron, we divided  
282 all tiff stacks into eight slabs.

### 283 **Combining SWCs**

284 The SWCs of individual tiles of tiff stacks are combined to form the SWC of the entire neuron.  
285 The positions of SWCs are shifted based on the relative coordinates obtained in the stitching  
286 process. The SWC points of individual stacks are read in sequentially. To void duplicated SWC  
287 points in the overlapping regions of adjacent stacks, pixels near the SWC points that are already  
288 read in are marked occupied. If the position of SWC points are at the marked pixels, they are  
289 deleted. After reading in the SWC points of all stacks, we extend the end points and connect  
290 them if they are nearby. Isolated short branches ( $< 5$  SWC points) and small protrusions ( $< 3$   
291 SWC points) from main branches are deleted to reduce noise in the SWC structure. The results  
292 SWC structure for the example neuron is shown in Fig. 10a-d.

### 293 **Manual editing and error correction**

294 The SWC structure created by the automatic algorithm requires editing, such as removing  
295 noise, tracing thin or faint dendrites, connecting ends, and correcting mistakes in the radii and  
296 positions of the SWC points and in the connections between them. We have designed ShuTu  
297 to make these operations easy for the user. In this section we highlight a number of editing  
298 techniques.

## 299 **Inspecting the reconstruction**

300 The SWC structure can be examined in three ways: Tile Manager, Stack View, and 3D View  
301 (Fig. 11). In Tile Manager, the SWC structure is overlaid with 2D projection of the entire neuron  
302 (Fig. 11a). In this view, it is easy to identify missing, discontinuous, or incorrectly connected  
303 branches.

304 Double clicking on one tile in Tile Manager loads the tiff stack into Stack View (Fig. 11b),  
305 in which the SWC structure is overlaid with the image. The radii, depths and connectivity of  
306 the SWC points can be examined in detail by scrolling up and down through the  $z$  dimension  
307 of the tiff stack.

308 From Stack View, a 2D projection can be created by clicking on Make Projection button  
309 (Fig. 12). There is an option to subdivide the stack into multiple slabs in  $z$ , in which case  
310 separate 2D projections are created. Subdivision is useful when the branching patterns are  
311 complicated. Mistakes in the reconstruction can be easily spotted in Projection View, including  
312 missed branches, broken points, incorrect connections, and inclusion of noise (Fig. 12). Incorrect  
313 positions and diameters for the SWC points are easy to identify as well.

314 In 3D View, the SWC structure can be rotated and shifted in order to reveal incorrect  
315 connections, especially large jumps in  $z$ , which can be obscure in other views.

316 Editing can be done in Stack View, Projection View, and 3D View. In all cases, after any  
317 editing, the SWC structure is updated in all views. A selected point can be deleted or moved  
318 and its radius can be modified. A selected point in Projection View or 3D View can also be  
319 located in Stack View for further examination and modification using the tiff stack.

## 320 **Adding SWC points**

321 In Stack View, SWC points can be added in three ways. The first method is smart extension.  
322 The user selects an SWC point on a branch that needs extension, finds a target point on the  
323 branch and locates the focus plane in  $z$ , and then clicks on the target. SWC points will be  
324 added along the branch from the selected SWC point to the target point (Fig. 13a). The

325 path is computed with the shortest distance algorithm, and the radii and positions of the SWC  
326 points are automatically calculated using the automated algorithm described above. The second  
327 method is manual extension. It is the same as the smart extension, except that the only point  
328 added is at the target point and its radius needs to be adjusted manually. The third method is  
329 mask-to-SWC (Fig. 13b). In Projection View, a mask along a branch is drawn by selecting the  
330 start and end points. The path is automatically computed with the shortest-distance algorithm.  
331 The mask can also be drawn manually. After the mask is completed, it is converted to SWC  
332 points along the branch. The positions and radii of the SWC points are computed automatically.

333 These three ways of adding SWC points are complimentary. When the branch to be recon-  
334 structed is long, the mask-to-SWC method is efficient. However, it requires that the underlying  
335 signals is strong enough, otherwise the computation of the path and the depths can be inaccu-  
336 rate. When the branch to be covered is short, the smart extension method is efficient, although  
337 it also requires relatively strong signal. Manual extension always works.

338 ShuTu users can reconstruct the entire neuron with one of these three methods. The ex-  
339 tension methods can be used after creating a single seed SWC point. However, the process is  
340 tedious because the focus plane must be located in every click. The mask-to-SWC method traces  
341 branches in 2D projections, and is therefore more efficient.

## 342 **Modifying connections**

343 The end points in the SWC structure are highlighted with blue or yellow colors. In some cases,  
344 it is necessary to connect nearby points that have been incorrectly identified as end points. This  
345 can be done by selecting two end points and connecting them. If the distance between the  
346 two points are more than the sum of their radii, SWC points can also be added automatically  
347 while bridging the gap. A selected end point can also be automatically connected to its nearest  
348 neighbor.

349 Incorrect connections can be broken after selecting two connected SWC points. The branch-  
350 ing points are highlighted with green; these points need to be examined carefully for incorrect

351 connections, especially when branches cross.

352 All SWC points connected to a selected point can be highlighted (Fig. 14). This is useful for  
353 finding broken connections in the SWC structure. At the end of the reconstruction, all SWC  
354 points that belong to the neuron should be connected. At this point, all noise points can be  
355 deleted in a single step.

### 356 **Reconstruction efficiency**

357 To quantify the efficiency of reconstructing neurons through the automatic algorithm and manual  
358 editing, we counted the number of editing operations (NEO) required for achieving the final  
359 reconstructions starting from the one generated by the automatic algorithm. The results for the  
360 example neuron are shown in Fig. 15. The SWC points that are added in the editing phase are  
361 shown in red, and those from the automatic reconstruction are shown in blue (Fig. 15a,b). The  
362 added SWC points are about 9% of the total SWC points in the structure. The NEO is 850.  
363 Among the editing operations, extensions are dominant. Correcting connection mistakes are  
364 sizable as well. The manual time spent in repairing the automatic reconstruction was around  
365 1.5 hours.

366 The efficiency of reconstruction depends on the image quality and the complexity of the  
367 neuron morphology. For neurons with sparse processes, the automated reconstruction captures  
368 the most of neuronal structure, and manual editing is not intensive. For the example shown  
369 in Fig. 16a, which is a mouse CA3 pyramidal neuron, simpler than the one shown in previous  
370 figures, the NEO is 137, and the time spent in editing was approximately 30 minutes. In  
371 contrast, when the processes are dense, the automated reconstruction contains many misses and  
372 mistakes, and manual editing takes more efforts. An example is shown in Fig. 16b, which is a  
373 rat CA1 pyramidal neuron; the NEO is 999, and the time spent in editing was approximately  
374 2.5 hours. The complexity of the processes requires more time for examining the appropriate  
375 dendritic structures. Another example of a complex neuron is shown in Fig. 16c, which is a  
376 mouse Purkinje cell imaged with confocal microscope. The increased complexity decreases the



377 quality of automated reconstruction, and the NOE is 1373, leading to approximately 2.6 hours  
378 of editing.

## 379 Discussion

380 We have demonstrated how ShuTu can be used to reconstruct neuron morphology by converting  
381 microscope images to SWC files. Our goal is to provide a practical system that can be readily  
382 implemented and used in labs who need accurate dendritic reconstructions of neurons that have  
383 been studied and stained following recordings with patch-clamp electrodes. As an open-source  
384 software package, it can be continuously improved by the community. We have also provided  
385 raw images [SITE ADDRESS], which should be useful for testing and improving the software.

386 A major aim of our software package is to minimize human labor in reconstructing neurons.  
387 We introduced editing functions in ShuTu to improve the efficiency of editing, and implemented  
388 a method for counting the number of editing operations (NEO) as the measure of the success of  
389 automatic reconstruction. The algorithm for reconstruction and editing functions were developed  
390 with the goal of optimizing the automated reconstruction and reducing NEO. For example, our  
391 automatic reconstruction algorithm can be aggressive in finding neurites, including faint ones,  
392 despite the fact that this may lead to inclusion of more noise in the reconstruction. During the  
393 editing phase, this noise can be easily eliminated once the SWC points belonging to the neuron  
394 are all connected (Fig. 14). In contrast, if the aim is to analyze morphological metrics such as  
395 Sholl analysis (Sholl, 1953) based on the automatically reconstructed neurons without manual  
396 editing, such noise could be problematic.

397 There are many parameters in our reconstruction algorithm. The user should experiment  
398 with these parameters as the optimal settings may depend on properties of the images, which  
399 are likely to vary depending on staining and imaging procedures. Among the most important  
400 parameters are the distances between pixels and between the successive planes, which are de-  
401 termined by the image acquisition process. Also important is the number of subdivisions of one  
402 tiff stack. Since our algorithm relies on 2D projections, subdivision reduces overlap of neurites

403 from different depths, and improves the reconstruction quality. Checking the validity of each  
404 SWC point is critical, so the users should pay close attention to adjusting these parameters.  
405 In Appendix 2, we have pointed out other important parameters while describing the technical  
406 details of the automatic reconstruction algorithm.

407 There are a number of open-source software packages for reconstructing neurons, most no-  
408 tably Vaa3D (Peng et al., 2014) and neuTube (Feng et al., 2015). Vaa3D has extensive capabil-  
409 ities for processing images from various kind of sources. In contrast, we focused on optimizing  
410 our software for the particular application of neurons stained with a dark reaction product fol-  
411 lowing patch-clamp recording. Although ShuTu may work for neurons stained in other ways,  
412 we have made no attempt to optimize it for use with multiple staining and imaging procedures.  
413 In addition, ShuTu was developed with a philosophy that perfect automatic reconstruction is  
414 difficult, if not impossible. Therefore, we emphasized the importance of manual annotation  
415 and error correction. In keeping with this philosophy, ShuTu includes user-friendly software to  
416 facilitate these processes.

417 Another open-source software package for neuron reconstruction – neuTube – also has a  
418 strong 3D capability for manipulating SWC structure. As ShuTu is based on neuTube (T. Zhao  
419 is a contributor to both), many of the features of ShuTu are adaptations of neuTube. However,  
420 ShuTu includes several important extensions. neuTube was designed to deal with single tiff  
421 stack. As such, it was not designed to deal with reconstructing entire neuron, unless the neuron  
422 is contained in a single tiff stack.

423 ShuTu is a complete solution that includes the capability to deal with multiple tiff stacks,  
424 including modules for processing and stitching the images. In the interactive mode, the neuron  
425 structure is represented in multiples ways that are all linked (Fig. 11), thus improving the ease  
426 and accuracy of editing the SWC structure.

427 Commercial solutions for neuron reconstruction also exists (e.g. NeuroLucida 360, MBF Bio-  
428 science; Imaris FilamentTracer, Bitplane). Detailed comparison of ShuTu to these other software  
429 packages is difficult, as it requires mastery of all of them to be fair. We encourage authors and

430 users of other software packages to test ShuTu on their dataset or test their favorites on the  
431 images used in this work, and provide feedback.

432 Staining neurons with biocytin is common in patch-clamp experiments. However, methods  
433 for reconstructing neurons based on biocytin are limited. When dealing with bright-field images  
434 like the biocytin data, a common strategy is to apply some preprocessing method first (Türetken  
435 et al., 2011; Narayanaswamy et al., 2011; Zhou et al., 2015), making the images friendly for  
436 automatic reconstruction. Preprocessing, however, is often computationally intensive and does  
437 not guarantee good performance. ShuTu is specifically tailored to deal with inherent problems  
438 with images from biocytin filled neurons.

439 ShuTu is not restricted to biocytin-filled neurons. In principle, it can also handle images  
440 from confocal and fluorescent microscopy, simply by inverting the images. However, we made  
441 no attempt to develop this application of ShuTu. Care is likely to be necessary in ensuring that  
442 microscopy and image acquisition properties are optimized to maximize the utility of ShuTu for  
443 this application. For now, we have chosen to leave this enhancement to others and focus our  
444 efforts on one common method of staining and imaging neurons.

445 Improving image quality will inevitably improve the efficiency and accuracy of neuron re-  
446 construction. Users need to make sure that high quality images are taken by following proper  
447 microscopy practices and protocols. Tissue fixation and clearing processes can influence the  
448 accuracy of the reconstructed neurons. Tissue shrinkage often occurs during the fixation pro-  
449 cess. To be accurate these factors need to be quantified for specific experimental settings and  
450 the dimensions of the reconstructed neurons need to be adjusted to account for shrinkage and  
451 distortion.

452 ShuTu has some limitations. It is not designed to trace axons, which are often too thin  
453 and faint following patch-clamp recording to trace automatically. Spines are not marked. In  
454 addition, ShuTu cannot reliably handle multiple neurons stained simultaneously. It is possible  
455 that editing operations currently requiring human judgements, such as when dendritic branches  
456 closely cross each other, could be automated in the future using machine learning approaches

457 (Turaga et al., 2010).

458 In conclusion, we have shown that ShuTu provides a practical solution for efficient and  
459 accurate reconstructions of neuron morphology. The open-source nature of the software will  
460 allow the research community to improve the tool further, and increased efficiency in neuronal  
461 reconstruction should facilitate more studies incorporating quantitative metrics of dendritic  
462 morphology and computer simulations of dendritic function.

## 463 **Materials and Methods**

### 464 **Whole-cell recording and neuron staining**

465 All experiments were performed according to protocols approved by the Institutional Animal  
466 Care and Use Committee of the Janelia Research Campus. Acute brain slices were prepared  
467 from mice (17-30 days old). After animals were deeply anesthetized with isoflurane, they were  
468 decapitated and the brain rapidly removed into chilled cutting solution consisting of (in mM)  
469 215 sucrose, 2.5 KCl, 20 glucose, 26 NaHCO<sub>3</sub>, 1.6 NaH<sub>2</sub>PO<sub>4</sub>, 1 CaCl<sub>2</sub>, 4 MgCl<sub>2</sub>, and 4 MgSO<sub>4</sub>.  
470 Hippocampi were dissected out and cut into 400  $\mu$ m thick transverse sections on a Leica VT  
471 1200s vibrating microslicer (Leica, Ltd., Germany). The cutting solution was slowly exchanged  
472 with artificial cerebrospinal fluid (ACSF) containing (in mM) 124 NaCl, 2.5 KCl, 10 glucose,  
473 26 NaHCO<sub>3</sub>, 1.0 NaH<sub>2</sub>PO<sub>4</sub>, 2.0 CaCl<sub>2</sub>, and 1.0 MgCl<sub>2</sub>. Both cutting and ACSF solutions were  
474 saturated with 95% O<sub>2</sub> and 5% CO<sub>2</sub> (pH 7.4). The slices were incubated at room temperature  
475 for at least 1 hour before recording, and then were transferred as needed to a submersion-type  
476 recording chamber perfused with ACSF at 2 ml/min.

477 Whole-cell recordings were obtained by visualized patch technique under IR-DIC optics.  
478 The recording pipette resistance ranged between 4 and 6  $M\Omega$ . Series resistance (6 - 15  $M\Omega$ )  
479 and input resistance were monitored throughout each voltage-clamp recording. Recordings with  
480 >10% change in series resistance were excluded. All experiments were performed in the current-  
481 clamp configuration. The intracellular pipette solution consisted of (in mM) 135 K-gluconate,

482 5 KCl, 1 CaCl<sub>2</sub>, 0.1 EGTA-Na, 10 HEPES, 10 glucose, 5 MgATP, and 0.4 Na3GTP, 0.1% bio-  
483 cytin, pH 7.2 280-290 mOsm. Resting potential ranged from -69 to -58 mV. Maximal recording  
484 time after dissection was 6 hr. Recording temperature was set to  $32.0 \pm 0.1$  C° using a TC-  
485 344A single-channel temperature controller (Warner Instruments, Inc, Hamden, CT, USA). All  
486 experiments were executed with a Dagan BVC-700 amplifier, digitized (3 - 5 kHz) using an  
487 ITC-16 analog-to-digital converter (Instrutech) and analyzed using custom-made software for  
488 IgorPro (Wavemetrics Inc., Lake Oswego, OR, USA). All chemicals were purchased from Sigma-  
489 Aldrich (St. Louis, MO, USA). Neurons were filled with biocytin and fixed (12-24 hours) with  
490 paraformaldehyde (4%) after recording, then washed in 1X PBS solution. Biocytin staining was  
491 carried out with vector PK4000 and SK4100 kits (Vector Laboratories, Burlingame, CA, USA).

## 492 **System requirements and installation**

493 The software requires installation of `Python` and `Open MPI`. The software package has been  
494 tested on a desktop computer with Intel Core i7-4770 CPU@3.40GHz CPU and 16 GB memory,  
495 running Ubuntu 14.04 LTS. `Python` was version 2.7.6. These are typical settings for current  
496 high-end desktop computers. Multiple processors are desirable since the algorithms are designed  
497 to utilize multiple processors to speed up computation. However, the memory usage must be  
498 monitored to make sure that the demand on memory does not exceed 100%. The number of  
499 processors used is specified in `ShuTu.py` (variable `nProc`).

500 ShuTu can be downloaded from

501 <https://www.janelia.org/shutu>,

502 or

503 <http://personal.psu.edu/dzj2/ShuTu/>.

504 An installation script is provided for Ubuntu and Mac OSX systems. In the directory of `ShuTu`,  
505 one can run

506 `sudo ./build.sh`,

507 which checks and installs necessary software including `python` and necessary modules, as well  
508 as Open MPI. The C programs are also compiled.

509 The source code for ShuTu is available at <https://github.com/tingzhao/ShuTu>.

## 510 **Image acquisition and processing**

511 The software works with tiles of tiff stacks covering the entire neurons. Nearby tiles overlap,  
512 typically by 20%, to help fine tune the relative positions of the tiles (“stitching”). The names of  
513 the tiff stacks use the convention of a common string (`filenameCommon` followed by a number and  
514 `.tif`). With the  $x, y$  positions of the tiles specified, one can use the function `stitchShiftTiles`  
515 to stitch the tiles. The results are stored in file `filenameCommon.json`.

516 Modern microscopes often allow automatic generations of overlapping tiles of tiff stacks. In  
517 our case, we imaged hippocampal neurons with Zeiss Axio Imager with AxioCam and Zen blue  
518 software. Once the boundary in the field of view ( $XY$ ) and the range of the depths ( $Z$ ) that  
519 contain the neuron are set, the images at each tile position and depths are automatically taken,  
520 and the positions of the image are stored in an `xml` file. The filenames of these images contain  
521 information about the tile number and depth. Using them, we assemble all images at different  
522 depths for each tile into one tiff stack (script `createTiffStacksZeiss.py`). The command is  
523 `python createTiffStacksZeiss.py dataDirectory filenameCommon`

524 Here `dataDirectory` is the path to the directory in which the `xml` file resides. The images of  
525 the planes are stored in a subdirectory. `filenameCommon` is the common part of the names given  
526 to the created tiff stacks.

527 The user can generate the overlapping tiff stacks in other ways. The files should be named  
528 in the format of `filenameCommon1.tif`, `filenameCommon2.tif`, etc.

529 The tiff stacks are preprocessed using the command

530 `python processImages.py dataDirectory`

531 If the images are dark-field, the command should be

532 `python processImages.py dataDirectory 1`

533 In this case, the images are inverted into bright-field images. The original images are re-  
534 named by adding `.org.tif` to the end of the original file names, and are moved to a directory  
535 `OriginalImages`.

536     Stitching the images is done with function `stitchShiftTiles`, which takes lists of the tile  
537 numbers, the  $x, y$  positions of the top left corners of the tiles and the size of the images  $nx,$   
538  $ny$ . The  $x, y$  positions can be in arbitrary unit and need not be precise; all that matters  
539 is that they convey which tiles are neighbors and roughly how much they overlap. Func-  
540 tions are also provided in cases the tiles are on grid and offset percentage is known (func-  
541 tion `gridStitchImages`); or the offset percentage and images sequences are specified in a text  
542 file (function `tileSequencesStitch`). In our case, all these information can be read from  
543 the `xml` file generated by the Zen Blue software during automatic image acquisition (function  
544 `xmlStitchImages`). Stitching is done with the script `stitchTilesZeissXML.py` using the com-  
545 mand

546 `python stitchTilesZeissXML.py dataDirectory`

547 After stitching is done, one can proceed to reconstruct the neuron semi-automatically using  
548 the software `ShuTu` (see Appendix 1). Another choice is to run the automatic reconstruction  
549 algorithm to create a draft reconstruction and edit it using `ShuTu` (see below).

550     In stitching, the precise offsets of nearby tiles are computed by maximizing phase correlation  
551 (Zitova and Flusser, 2003). Using the maximum spanning tree algorithm (Graham and Hell,  
552 1985), a tree graph connecting all tiles and maximizing the sum of phase correlations along the  
553 connected nearby tiles is computed and used to set the relative coordinates of all tiles.

## 554 **Automated reconstruction**

555 The code for automated reconstruction is written in C (`ShuTuAutoTrace.c`). The C code is  
556 parallelized with MPI protocol, and runs with the command

557 `mpirun -n np ./ShuTuAutoTrace dataDirectory ShuTu.Parameters.dat,`

558 where `np` is the number of processors used and `ShuTu.Parameters.dat` is a text file that contains  
559 the parameters. This creates a SWC file `fnamecommon.auto.swc` in `dataDirectory`, which can  
560 be loaded in `ShuTu` for manual editing (`File`→`expand current`→`swc`).

## 561 **Appendix 1: Editing commands for ShuTu**

### 562 **Loading a project**

563 A reconstruction project can be opened by clicking on `Open Project` icon or `File` → `Open`  
564 `Project`. In the directory of the neuron, there should be a file `filenameCommon.tiles.json`,  
565 which is created after stitching the tiff stacks. Clicking on it opens `Tile View`, in which the  
566 2D projections of the tiff stacks are shown. The 2D projection of the neuron should be visible.  
567 If there is a previous reconstruction of the neuron, which is stored a file `filenameCommon.swc`,  
568 it will be automatically loaded and overlaid onto the 2D projection. The SWC file generated  
569 by the automated algorithm, `filenameCommon.auto.swc`, can be loaded by selecting `File` →  
570 `Expand current` → `SWC`.

571 Double clicking on any tile in the `Tile View` loads the corresponding tiff stack in `Stack`  
572 `View`. The loaded SWC points are overlaid onto the tiff stack. To go up and down in the  
573 `z`-dimension, use the right and left arrow keys.

574 Clicking on `Make Projection` button creates 2D projection of the tiff stack. The user  
575 can specify the number of subdivisions used in the projection. All of the projections of the  
576 subdivisions are contained in the `Projection View`, which can be browsed with the left and  
577 right arrow keys.

578 The SWC structure is also displayed in `3D View`. It can be rotated with the arrow keys, and  
579 shifted with the arrow keys while pressing the `Shift` key,

580 In all views, zoom is controlled with `+` and `-` keys. After zooming in, different parts of the  
581 images can be navigated by pressing-dragging the mouse.



582 The functions of the arrow keys can be also performed with mouse wheel or track pad when  
583 available.

## 584 **Editing SWC points**

585 The SWC structure can be edited in **Stack View**, **Projection View**, and **3D View**. All editing  
586 can be reversed by **Ctrl-z** (or **Command-z**). Colors of SWC points indicate their topological roles  
587 in the structure: yellow and blue indicate the end points of branches; green at the branching  
588 points; and red the interior points. Lines between SWC points indicate their connectivity.

589 In **Stack View**, an SWC point is plotted with a circle at its *xyz* position in the tiff stack.  
590 The radius of the circle the same as that of the SWC point. As the focus plane shifts away from  
591 the *z* of the SWC point, the circle shrinks with its color fading. This helps the user to visually  
592 locate the *z* of the SWC points and inspect whether the positions and radii of the SWC points  
593 match the underlying signals of the neurites in the tiff stack.

594 Extension is the most used editing function. In **Stack View**, it can be done in two ways.  
595 The first is manual extension. Click an SWC point to extend, and the cursor becomes a circle  
596 connected to the SWC point. Focus on the target neurite using the arrow keys, and match  
597 the radius of circle with that of the neurite using **e** and **q**. **Ctrl**-clicking on the target points  
598 creates a new SWC point connected to the starting SWC point. (In Mac, use **Command** instead of  
599 **Ctrl**.) The second is smart extension. It is the same as manual extension, except that the user  
600 clicks without pressing **Ctrl**. This method allows clicking far from the starting SWC points; the  
601 algorithm fills in additional connected SWC points along the neurites with the radii and depths  
602 automatically calculated. Smart extension works well when the underlying signal is strong.

603 To change the properties of a particular SWC point, select it by clicking on it and pressing  
604 **Esc** to come out of the extension mode. The radius can be changed with **e** and **q**. It can be  
605 moved with **w,s,a,d** for up, down, left, right. Pressing **x** deletes it.

606 To connect two SWC points, click on the first point and **Shift**-click on the second point,  
607 then press **c**. Pressing **Shift-c** after selecting two points automatically fills additional SWC

608 points, similarly as in the smart extension. To disconnect two SWC points, select them then  
609 press **b**.

610 In **Projection View**, 2D projections of the subdivisions of the tiff stack are overlaid with the  
611 SWC points. In this view it is easier to spot missed branches and incorrect connections. There  
612 is also a mask-to-SWC method for tracing branches. To draw a mask along a branch, press **r**.  
613 The cursor becomes a red dot. Roughly match the radius of the dot with that of neurite with **e**  
614 and **q**. Click on the start point, then **Shift**-click on the target. A red mask will be drawn along  
615 the branch. Clicking on **Mask** → **SWC** button converts the mask into SWC points, which can be  
616 examined in detail in the **Stack View**. The mask can also be drawn manually by press-dragging  
617 the mouse along the branch. To get of out the mask drawing mode, press **Esc**.

618 Clicking on an SWC point selects it. Pressing **z** locates the selected point in the **Stack View**,  
619 and its **z** position and other properties can be further examined with the tiff stack.

620 The user can directly modify the connections in the **Projection View**. The operations are  
621 the same as in the **Stack View**.

622 In **3D View**, the user can examine and modify the connections between SWC points. Con-  
623 necting or breaking connections between two SWC points is the same as in the **Stack View** and  
624 the **Projection View**. Selecting an SWC point and pressing **z** locates it in the **Stack View** for  
625 further examination and extension. This operation also loads a new tiff stack if the selected  
626 point is not in the current tiff stack.

627 A useful way of locating broken points in the SWC structure is the operation that selects all  
628 connected SWC points to the selected SWC point. It is done by pressing **s-3**, or right-clicking  
629 the mouse and selecting **Select** → **All connected nodes**.

630 After correctly connecting all SWC points belonging to the neuron, the user can delete all  
631 noise points simply by selecting all SWC points in the neuron, right-clicking the mouse, and  
632 performing **delete unselected**.

### 633 **Annotating, saving, and scaling the SWC structure**

634 After the reconstruction is done, the user needs to annotate the SWC points as soma, axon,  
635 apical dendrite, basal dendrite. This is best done in the 3D View. In the panel `control and`  
636 `settings`, change `Color Mode` to `Branch Type` to reveal the types of SWC points. To annotate  
637 the soma, the user can select one point in the soma, right-click the mouse, and select `Change`  
638 `Property` → `Set as root`. More SWC points belong to the soma can be selected by `Shift-`  
639 `clicking`. Then right-click to bring up the menu, then select `Change type` and set the value to  
640 1. The SWC points in the soma are shown in blue.

641 To annotate the axon, select the one SWC point closet to the soma, and press `s-1`. This  
642 selects all SWC points down stream of the selected point. Then change type to 2. Basal dendrites  
643 and apical dendrite can be similarly annotated, and their types are 3 and 4, respectively.

644 In the panel `control and settings`, setting `Geometry` to `normal` produces the volume  
645 representation of the SWC structure, with surface rendered between adjacent SWC points.

646 To save the reconstruction, click on the objects in the panel `Objects`, which selects the  
647 corresponding SWC points. Then in the window of the SWC structure, left-click and do `save`  
648 `as`. It is best to use the default filename `filenameCommon.swc`.

649 The dimensions of the SWC points in `filenameCommon.swc` are pixel based. To convert  
650 them into physical dimensions in  $\mu\text{m}$ , type in the terminal

```
651 python scaleSWC.py dataDirectory
```

652 This process uses `xyDist` and `zDist` in `ShuTu.py`, which specify in  $\mu\text{m}$  the `xy` pixel distance and  
653 `z` distance between successive planes. The results are saved in `filenameCommon.scaled.swc`.

654 Right after finishing the reconstruction and with `ShuTu` closed, the number of various editing  
655 operations can be analyzed using the command

```
656 python analyzeNEO.py
```

657 A plot similar to Fig. 15c will be generated. The script `analyzeNEO.py` parses the log file  
658 generated by `ShuTu`. The log file can contain several neuron reconstruction sessions, but the

659 script only parses the most recent one. When estimating the total time of manual editing, idle  
660 times of the user are excluded if they are detected in the log file.

661 There are many more editing functions in ShuTu. The user can refer to **Help** for more  
662 instructions.

## 663 **Appendix 2: Technical details of automated reconstruction**

664 Here we provide technical details of the automated reconstruction algorithm presented in the  
665 main text. These details should help the users to adjust parameters for their specific needs, and  
666 facilitate further development of the algorithm. The parameters in each step are summarized in  
667 series of tables. The algorithm is explained with the same example used in the main text.

### 668 **Coordinate system**

669 A tiff stack consists of successive 2D images (referred to as planes) taken at increasing depths  
670 at regular intervals. We denote a pixel in a tiff stack with coordinates  $(x, y, z)$ . Here  $x, y$  are  
671 the pixel positions in the planes, and  $z$  is the depth. We take the convention that in a plane,  
672 the  $x$  axis points vertically downwards and the  $y$  axis horizontally to the right (Fig. 1).

673 The distance between neighboring pixels in  $x$  and  $y$  is denoted as  $d_{xy}$ . The distance between  
674 successive planes is denoted as  $d_z$ . In the example,  $d_{xy} = 0.065 \mu\text{m}$ , and  $d_z = 0.5 \mu\text{m}$  (Table 1).

### 675 **Preprocessing**

Our algorithm requires that the images are grayscale with bright background. Other image  
types must be converted into bright-field grayscale images, and this is done in preprocessing. In  
particular, color images are converted into grayscale according to

$$I_g(x, y, z) = 0.21I_r(x, y, z) + 0.72I_g(x, y, z) + 0.07I_b(x, y, z),$$

676 where  $I_g$  is the intensity of the grayscale and  $I_r, I_g, I_b$  are those of the red, green, and blue  
677 channels. Dark-field images are inverted by subtracting the grayscale intensity at each pixel  
678 from the maximum intensity of the tiff stack.

679 To reduce pixel noise, each plane is smoothed with 2D Gaussian filter with  $\sigma = 1$  pixel. The  
680 intensity is linearly scaled so that the range is from 0 to 1 for the tiff stack.

## 681 **2D projection**

682 We identify neurites in a tiff stack from its minimum-intensity 2D projection. The intensity  
683  $I(x, y)$  of the 2D projection is taken as the minimum intensity among all pixels with the same  
684  $z$ . Projections of dendritic branches form dark paths in  $I(x, y)$  (Fig. 3a). Shadows of branches  
685 in out-of-focus planes (Fig. 2d) do not create separate dark paths in the 2D projection; instead,  
686 their projections flank those of the branches, forming smooth decay of intensity away from the  
687 center lines of the branches. The problem of confusing the shadows of the branches as neurites  
688 in the out-of-focus planes, as shown in Fig. 2d, does not exist in the 2D projection.

689 To eliminate smooth variations of the background due to uneven lighting, we subtract from  
690  $I(x, y)$  a background, which is obtained by blurring  $I(x, y)$  with a Gaussian filter with standard  
691 deviation  $\sigma_b = 2 \mu\text{m}$  (Fig. 3b). We then normalize the range of  $I(x, y)$  to  $(0, 1)$  (Fig. 3c). Smaller  
692  $\sigma_b$  enhances weak signals relative to strong signals (Fig. 3d). This is because the background  
693 with smaller  $\sigma_b$  tracks the signal strength more closely, and when subtracted, takes away more  
694 from the strong signals. But  $\sigma_b$  should be large enough to ensure that the subtracted background  
695 is smooth and does not weaken the signals.

## 696 **Binary mask**

697 From the 2D projection we create a binary image  $b(x, y)$  to indicate pixels that belong to neurites.  
698 Specifically,  $b(x, y) = 1$  for pixels in the neurites (foreground pixels) and  $b(x, y) = 0$  for those  
699 in the background (background pixels). We call the area defined by the foreground pixels as  
700 binary mask.

The first step in creating the mask is convolving  $I(x, y)$  with valley detectors with varying orientations, and finding the maximum and minimum responses to the detectors (Fig. 3e). A valley detector  $f(x, y)$  is a patch of 2D image (or filter) consisting of an oriented dark band flanked by two bright bands. Mathematically the filter is expressed as

$$f(x, y) = \frac{1}{2\pi\sigma^2} \frac{\partial^2}{\partial \tau^2} e^{-(x^2+y^2)/2\sigma^2},$$

which is a directional second derivative of a Gaussian with standard deviation  $\sigma$ . Here

$$\frac{\partial}{\partial \tau} = \hat{\tau} \cdot \nabla = \tau_x \frac{\partial}{\partial x} + \tau_y \frac{\partial}{\partial y},$$

701 where  $\hat{\tau} = \tau_x \hat{x} + \tau_y \hat{y}$  is a unit vector perpendicular to the orientation of the dark band.

702 Convolution of  $I(x, y)$  with the filter creates the response  $R(x, y)$ :

$$\begin{aligned} R(x, y) &= \int dx' dy' I(x + x', y + y') f(x', y') \\ &= I_{xx} \tau_x^2 + 2I_{xy} \tau_x \tau_y + I_{yy} \tau_y^2, \end{aligned} \quad (1)$$

where

$$I_{xx} = \frac{1}{2\pi\sigma^4} \int dx' dy' I(x + x', y + y') \left( \frac{x'^2}{\sigma^2} - 1 \right) e^{-(x'^2+y'^2)/2\sigma^2},$$

$$I_{xy} = \frac{1}{2\pi\sigma^4} \int dx' dy' I(x + x', y + y') \frac{x' y'}{\sigma^2} e^{-(x'^2+y'^2)/2\sigma^2},$$

$$I_{yy} = \frac{1}{2\pi\sigma^4} \int dx' dy' I(x + x', y + y') \left( \frac{y'^2}{\sigma^2} - 1 \right) e^{-(x'^2+y'^2)/2\sigma^2}.$$

We obtain the maximum or minimum response at  $(x, y)$  using the Lagrange multiplier method:

$$R' = I_{xx} \tau_x^2 + 2I_{xy} \tau_x \tau_y + I_{yy} \tau_y^2 - \lambda(\tau_x^2 + \tau_y^2 - 1).$$

At the extrema we have

$$0 = \frac{\partial R'}{\partial \tau_x} = 2(I_{xx} - \lambda)\tau_x + 2I_{xy}\tau_y,$$

$$0 = \frac{\partial R'}{\partial \tau_y} = 2I_{xy}\tau_x + 2(I_{yy} - \lambda)\tau_y.$$

703 These are linear equations, which can be expressed in matrix form as

$$\begin{pmatrix} I_{xx} - \lambda & I_{xy} \\ I_{xy} & I_{yy} - \lambda \end{pmatrix} \begin{pmatrix} \tau_x \\ \tau_y \end{pmatrix} = 0. \quad (2)$$

To have none-zero solutions for  $\tau_x$  and  $\tau_y$ , we must have

$$\begin{vmatrix} I_{xx} - \lambda & I_{xy} \\ I_{xy} & I_{yy} - \lambda \end{vmatrix} = 0,$$

where  $\lambda$  is the eigenvalue of the Hessian matrix. There are two solutions:

$$\lambda_1(x, y) = \frac{1}{2} \left( I_{xx} + I_{yy} + \sqrt{(I_{xx} - I_{yy})^2 + 4I_{xy}^2} \right),$$

$$\lambda_2(x, y) = \frac{1}{2} \left( I_{xx} + I_{yy} - \sqrt{(I_{xx} - I_{yy})^2 + 4I_{xy}^2} \right).$$

Here we chose  $\lambda_1(x, y) > \lambda_2(x, y)$ . Solving  $\tau_x$  and  $\tau_y$  from Eq. (2) and plugging in to Eq. (1), we find the response at the extrema:

$$R(x, y) = \tau_x^2 I_{xx} + 2I_{xy}\tau_x\tau_y + I_{yy}\tau_y^2 = \lambda(\tau_x^2 + \tau_y^2) = \lambda.$$

Hence the maximum  $R_m(x, y)$  of the responses  $R(x, y)$  to valley detectors at varying orientations is given by

$$R_m(x, y) = \lambda_1(x, y).$$

704 To see how we can create the mask from  $\lambda_1(x, y)$  and  $\lambda_2(x, y)$ , we exam three simple examples

705 of synthetic 2D images containing some aspects of 2D projections of the real images containing  
706 neurites.

The first example is a Gaussian valley in  $y$  direction:

$$I(x, y) = I_0 - \frac{I_1}{\sqrt{2\pi}\sigma_s} e^{-x^2/2\sigma_s^2}.$$

707 Here  $\sigma_s$  is the scale of the widths of the valley;  $I_0$  is the baseline intensity; and  $I_1$  is the amplitude.  
708 This is an idealized model of the 2D projection of a dendritic segment with half-width  $\sigma_s$ . An  
709 ideal mask for this Gaussian valley is a rectangular strip spanning the  $y$  direction, centered long  
710  $y$ -axis and with half-width  $\sigma_s$ .

$\lambda_1(x, y)$  and  $\lambda_2(x, y)$  are easily calculated. We find that

$$I_{xx} = \frac{I_1}{\sqrt{2\pi}(\sigma^2 + \sigma_s^2)^{3/2}} \left( 1 - \frac{x^2}{\sigma^2 + \sigma_s^2} \right) e^{-x^2/2(\sigma^2 + \sigma_s^2)},$$

and

$$I_{xy} = I_{yy} = 0.$$

Therefore,

$$\lambda_1 = \begin{cases} I_{xx}, & \text{if } I_{xx} \geq 0, \\ 0, & \text{if } I_{xx} < 0. \end{cases}$$
$$\lambda_2 = \begin{cases} 0, & \text{if } I_{xx} \geq 0, \\ I_{xx}, & \text{if } I_{xx} < 0. \end{cases}$$

We can obtain a mask close to the ideal mask by thresholding  $\lambda_1(x, y)$ . If we set the foreground pixels as those with  $\lambda_1(x, y) > 0$ , the boundary of the mask is given by

$$x_b = \pm \sqrt{\sigma^2 + \sigma_s^2}.$$

711 The half-width of the mask is  $\sqrt{\sigma^2 + \sigma_s^2}$ , and it is larger than  $\sigma_s$ . Taking  $\sigma \rightarrow 0$  leads to the



712 ideal mask. For finite  $\sigma$ , it is possible to set a higher threshold for  $\lambda_1(x, y)$  and obtain the ideal  
 713 mask; but this requires a threshold that depends on the width of the valley.

714 From this example we see that we can obtain a mask that closely follow dendritic branches  
 715 by thresholding the maximum responses to the valley detectors,  $\lambda_1(x, y)$ . The threshold should  
 716 be larger than 0. Larger  $\sigma$  for the detectors tends to broaden the mask; therefore it is desirable  
 717 to have small  $\sigma$  to obtain masks that closely cover the dendritic branches.

The second example is a Gaussian blob:

$$I(x, y) = I_0 - \frac{I_1}{2\pi\sigma_s^2} e^{-(x^2+y^2)/2\sigma_s^2}.$$

718 This is an idealized model for the 2D projections of spills created during the staining process  
 719 (Fig. 2a). Such spills are noise that should be eliminated; therefore the ideal mask for a Gaussian  
 720 blob should be empty.

We find that

$$I_{xx} = \frac{I_1}{2\pi(\sigma^2 + \sigma_s^2)} \left( 1 - \frac{x^2}{\sigma^2 + \sigma_s^2} \right) e^{-(x^2+y^2)/2(\sigma^2+\sigma_s^2)},$$

$$I_{xy} = -\frac{I_1 xy}{2\pi(\sigma^2 + \sigma_s^2)^2} e^{-(x^2+y^2)/2(\sigma^2+\sigma_s^2)},$$

$$I_{yy} = \frac{I_1}{2\pi(\sigma^2 + \sigma_s^2)} \left( 1 - \frac{y^2}{\sigma^2 + \sigma_s^2} \right) e^{-(x^2+y^2)/2(\sigma^2+\sigma_s^2)}.$$

Therefore,

$$\lambda_1(x, y) = \frac{I_1}{\pi(\sigma^2 + \sigma_s^2)} e^{-(x^2+y^2)/2(\sigma^2+\sigma_s^2)},$$

$$\lambda_2(x, y) = \frac{I_1}{\pi(\sigma^2 + \sigma_s^2)} \left( 1 - \frac{x^2 + y^2}{\sigma^2 + \sigma_s^2} \right) e^{-(x^2+y^2)/2(\sigma^2+\sigma_s^2)}.$$

721 We see that thresholding the maximum responses  $\lambda_1$  creates a circular mask, which is far from  
 722 the desired empty mask. To suppress creating foreground pixels for the Gaussian blob, additional  
 723 criteria for the mask are needed. We notice that near the center of Gaussian blob,  $\lambda_1$  and  $\lambda_2$   
 724 are approximately equal. This motivates another criterion for the mask: in addition to  $\lambda_1$  being

725 greater than a threshold, the foreground pixels must satisfy the condition  $\lambda_1 > \alpha_\lambda |\lambda_2|$ , where  
 726  $\alpha_\lambda > 1$  is a factor. This criterion should suppress foreground pixels for the Gaussian blob, except  
 727 around a ring near the radius  $\sqrt{\sigma^2 + \sigma_s^2}$ , where  $\lambda_2$  is close to zero. This is not the ideal mask  
 728 for Gaussian blob, but it is close. Note that this additional criterion does not affect the mask  
 729 for the Gaussian valley in the first example, hence does not interfere with detection of dendritic  
 730 branches.

The third example is a random image, which has a mean intensity  $I_0$  and no correlations between the pixels:

$$\langle (I(x, y) - I_0)(I(x', y') - I_0) \rangle = \sigma_I^2 \delta(x - x', y - y').$$

731 Here  $\sigma_I^2$  is the variance of the pixel intensity. This is an idealized model for random pixel noise  
 732 in the real images. The ideal mask should be empty.

It is easy to see that

$$\langle I_{xx} \rangle = \langle I_{xy} \rangle = \langle I_{yy} \rangle = 0.$$

Additionally,

$$\langle I_{xx}^2 \rangle = \langle I_{yy}^2 \rangle = \frac{3\sigma_I^2}{16\pi\sigma^6},$$

$$\langle I_{xy}^2 \rangle = \langle I_{xx}I_{yy} \rangle = \frac{\sigma_I^2}{16\sigma^6},$$

$$\langle I_{xx}I_{xy} \rangle = \langle I_{yy}I_{xy} \rangle = 0.$$

From these we find the mean of the responses

$$\langle R(x, y) \rangle = 0,$$

and the variance

$$\sigma_R^2 = \langle R(x, y)^2 \rangle = \frac{3\sigma_I^2}{16\pi\sigma^6},$$

733 where we have used  $\tau_x^2 + \tau_y^2 = 1$ .  $\sigma_R$  represents the range of the responses expected from random  
734 fluctuations of the intensity. To avoid creating foreground pixels for random fluctuations, we  
735 should set the threshold for  $\lambda_1$  larger than  $\sigma_R$ . But a threshold that is too large diminishes  
736 the mask for dendritic branches. Therefore the threshold for  $\lambda_1$  must be chosen to preserve  
737 the signals while suppressing random noise. Inevitably, some foreground pixels to noise are  
738 unavoidable, which creates random speckles in the mask (Fig. 3h).

A guideline for selecting the length scale  $\sigma$  in the valley detectors can be devised by combining the insights from the Gaussian valley and the random image. The peak of the maximum responses from the Gaussian valley, which occurs at  $x = 0$ , is given by

$$\lambda_{1,\max} = \frac{I_1}{\sqrt{2\pi}(\sigma^2 + \sigma_s^2)^{3/2}}.$$

Comparing this to the variance of the responses to the random image, we can define the signal-to-noise ratio as

$$\rho_s = \frac{\lambda_{1,\max}}{\sigma_R} = \frac{4I_1}{\sqrt{6}\sigma_I} \left( \frac{\sigma^2}{\sigma^2 + \sigma_s^2} \right)^{3/2}.$$

739 This ratio is an increasing function of  $\sigma$ . Therefore, a large  $\sigma$  is useful for suppressing noise. How-  
740 ever, a large  $\sigma$  overestimates the width of the valley (given by  $\sqrt{\sigma^2 + \sigma_s^2}$ ), leading to widening  
741 of the foreground pixels. For real images, such widening can create a mask that merges nearby  
742 branches, leading to an inaccurate representation of the neuronal structure. Hence the choice  
743 of  $\sigma$  is a compromise between enhancing the signal-to-noise ratio while avoiding the merger of  
744 nearby branches in the mask. When the intensity fluctuation is small, we can select a small  $\sigma$ ,  
745 leading to an accurate mask. If the fluctuation is large, we need to choose a large  $\sigma$  and live  
746 with the imperfect mask.

747 Based on the insights gained from the examples discussed above, we formulate the following  
748 procedure for creating the mask  $b(x, y)$  from  $\lambda_1(x, y)$  and  $\lambda_2(x, y)$ . Select  $\sigma$  of the valley detector  
749 such that the neurites are clearly visible in  $\lambda_1(x, y)$  (Fig. 3d). Set  $b(x, y) = 0$  with  $\lambda_1 < \alpha_\lambda |\lambda_2|$   
750 to suppress circular blobs in the 2D projection. Select a threshold  $\theta_\lambda$  above the noise level, and

751 set  $b(x, y) = 1$  if  $\lambda_1(x, y) > \theta_\lambda$  and  $b(x, y) = 0$  otherwise (Fig. 3e). Since pixels belonging to  
752 the neurites typically have higher  $\lambda_1$  compared to those with random fluctuations, we set the  
753 threshold  $\theta_\lambda$  such that the fraction of pixels selected to the mask is  $f_\lambda$ . For our example neuron,  
754 the parameter values are:  $\sigma = 0.1 \mu\text{m}$ ,  $\alpha_\lambda = 10$ , and  $f_\lambda = 0.1$  (Table 2).

755 The binary mask generated as above is noisy, and the boundaries for neurites are rugged  
756 (Fig. 3h). To clean up noise and smooth the boundaries, we use the sparse-field level-set method  
757 outlined in (Lankton, 2009), which is a technical report based on (Whitaker, 1998). The details  
758 of level-set smoothing is as follows.

For the 2D projection  $I(x, y)$  after background subtraction and normalization, we compute the gradient

$$g_r(x, y) = \sqrt{I_x^2 + I_y^2}.$$

We rescale the gradient so that the range is from 0 to 1. An edge indicator is defined as

$$g(x, y) = \frac{1}{1 + g_r^\beta},$$

where  $\beta$  is an exponential, typically smaller than 1, for compressing the gradient values. This function is minimal at edges of branches, where the gradients are larger. We seek a contour  $\mathcal{C}$  such that the energy function

$$\mathcal{E} = \mu L[\mathcal{C}] + \oint_{\mathcal{C}} dl g(l)$$

759 is minimized, where  $L[\mathcal{C}]$  is the total length of the contour and  $\mu$  is weight parameter that controls  
760 the smoothness of the contour. The curve that minimize this energy function will be smooth  
761 and sit along the maximum gradient boundaries between the branches and the background.

The contour can be expressed as the zero-crossing points of a level set function  $\phi(x, y)$ . Inside  $\mathcal{C}$ , we have  $\phi > 0$ , and outside  $\phi < 0$ . Note that

$$L[\mathcal{C}] = \oint_{\mathcal{C}} dl.$$

The unit vectors normal to the contours in  $\phi$  are given by

$$\hat{n} = -\frac{\nabla\phi}{|\nabla\phi|}.$$

Hence

$$L[\mathcal{C}] = \oint_{\mathcal{C}} dl \hat{n} \cdot \hat{n} = - \oint_{\mathcal{C}} dl \hat{n} \cdot \frac{\nabla\phi}{|\nabla\phi|} = - \int_{\mathcal{C}} dx dy \nabla \cdot \frac{\nabla\phi}{|\nabla\phi|}.$$

The last step uses the divergence theorem. Note that

$$- \int_{\mathcal{C}} dx dy \nabla \cdot \frac{\nabla\phi}{|\nabla\phi|} = - \int dx dy H(\phi) \nabla \cdot \frac{\nabla\phi}{|\nabla\phi|}.$$

Here  $H(\phi)$  is the step function; it is 1 if  $\phi > 0$  and 0 if  $\phi < 0$ . Integration by part gives

$$- \int dx dy H(\phi) \nabla \cdot \frac{\nabla\phi}{|\nabla\phi|} = \int dx dy \frac{\nabla\phi}{|\nabla\phi|} \cdot \nabla H(\phi) = \int dx dy \frac{\nabla\phi}{|\nabla\phi|} \cdot \nabla\phi \delta(\phi) = \int dx dy \delta(\phi) |\nabla\phi|.$$

The surface term is zero because  $H$  is zero at the boundary. Here  $\delta(\phi)$  is the Dirac  $\delta$ -function.

Therefore, we have

$$L[\mathcal{C}] = \int dx dy \delta(\phi) |\nabla\phi|.$$

Similarly, we can derive

$$\oint_{\mathcal{C}} dl g(l) = \oint_{\mathcal{C}} dl \hat{n} \cdot (g\hat{n}) = \int dx dy \delta(\phi) g(x, y) |\nabla\phi|.$$

Hence, we have

$$\mathcal{E} = \int dx dy (\mu + g(x, y)) \delta(\phi(x, y)) |\nabla\phi(x, y)|.$$

We use the variational method to find the  $\phi$  that minimizes  $\mathcal{E}$ . Noting that

$$|\nabla(\phi + \delta\phi)| = \sqrt{|\nabla\phi|^2 + 2\nabla\phi \cdot \nabla\delta\phi} = |\nabla\phi| + \frac{\nabla\phi \cdot \nabla\delta\phi}{|\nabla\phi|},$$

we find

$$\delta|\nabla\phi| = \frac{\nabla\phi \cdot \nabla\delta\phi}{|\nabla\phi|}.$$

Applying integration by part, we have

$$\delta\mathcal{E} = \int dx dy \left[ -\delta(\phi) \nabla \cdot \left( (\mu + g) \frac{\nabla\phi}{|\nabla\phi|} \right) \right] \delta\phi.$$

Setting  $\mathcal{E} = 0$ , we find

$$-\delta(\phi) \nabla \cdot \left( (\mu + g) \frac{\nabla\phi}{|\nabla\phi|} \right) = 0.$$

The surface term in the integration vanishes if we impose the Neumann boundary condition

$$\frac{\partial\phi}{\partial n} = 0.$$

At equilibrium and on  $\mathcal{C}$  we have

$$-\nabla \cdot \left( (\mu + g) \frac{\nabla\phi}{|\nabla\phi|} \right) = 0.$$

At other points,  $\phi$  can be arbitrary. Minimization of

$$\delta\mathcal{E} = \int dx dy f[\phi] \delta\phi$$

can be done by solving the equation

$$\frac{\partial\phi}{\partial t} = -f[\phi].$$

This equation implies

$$\delta\phi = -dt f[\phi]$$

at each time step. Therefore

$$\delta\mathcal{E} = - \int dx dy f[\phi]^2 dt < 0,$$

leading to decreasing  $\mathcal{E}$ . In our case, we need to evolve

$$\frac{\partial \phi}{\partial t} = \nabla \cdot \left( (\mu + g) \frac{\nabla \phi}{|\nabla \phi|} \right) = F$$

762 on the boundary. For  $\phi$  at points other than the boundary, we need to change  $\phi$  such that it  
763 remains a smooth function around the boundary and the second derivatives can be computed.  
764 We used the sparse-field implementation for solving this differential equation, which iteratively  
765 updates the sets of points near the boundary (Lankton, 2009). After  $N_{levelset}$  number of it-  
766 erations, we obtain a new binary mask by setting  $b(x, y) = 1$  if  $\phi(x, y) > 0$ , and  $b(x, y) = 0$   
767 otherwise.

In practice, we observe that it is sufficient to smooth the initial mask by minimizing the length of the boundary alone. Hence we set the edge indicator

$$g(x, y) = 0.$$

768 This is because the boundaries of the initial mask are already near the neurite boundaries.

769 The parameter  $\mu$  controls the smoothness of the boundary. Smoothing deletes small noisy  
770 speckles. Larger  $\mu$  creates smoother boundaries but can also cause small neurites to disappear.  
771 We set  $\mu = 0.1$ . Also important is the number of iterations  $N_{levelset}$ . It should be large enough  
772 to reduce noise and smooth the boundaries, but small enough not to lose structures due to  
773 over-smoothing. In our example we set  $N_{levelset} = 500$ .

774 As the final step, we remove connected pixels with total area smaller than  $A_s$ . This removes  
775 noise and cleans up the mask (Fig. 3f). In the example we set  $A_s = 1 \mu\text{m}^2$ .

776 Parameters for creating the mask are listed in Table 2.

### 777 **Creating SWC points from the mask**

778 Using the mask, we create the SWC points that describe the dendritic structure. The  $(x, y)$   
779 positions of the SWC points are placed along the centerlines of the mask. The radii  $r$  are set as

780 the shortest distances to the boundaries of the branches from the centerlines. The  $z$  positions  
781 are computed using the centerlines and the tiff stack.

782 The centerlines of the mask are obtained by skeletonization (Zhang and Suen, 1984). The  
783 skeleton is computed by iterative thinning of the mask based on the pixel values in the 8  
784 neighboring points (Zhang and Suen, 1984) (Fig. 4a). The distance from a pixel in the centerline  
785 to the nearest boundary is computed using the Euclidian distance transformation (Danielsson,  
786 1980) (Fig. 4b).

787 The depths  $z$  of the points on the centerlines of the mask are found in two steps. First,  
788 the centerlines are dissected into  $xy$ -paths (Fig. 4a). The  $xy$ -paths with length smaller than  
789  $l_{sm} = 0.5 \mu\text{m}$  are considered as noise and excluded. Second, a  $z$ -image is created by following  
790 the  $xy$ -path and cutting through the tiff stack (Fig. 4c). A dark valley in the  $z$ -image spanning  
791 from the left edge to the right edge indicates the branch whose 2D projection falls on the  $xy$ -  
792 path (Fig. 4c). A line through the valley can be found by evaluating all paths from the left  
793 edge to the right edge (red dotted line in Fig. 4c). Specifically, a left-right path in the  $z$ -image  
794 starts from a point at the left edge. The next point is selected from the three nearby points to  
795 the right (the change in  $z$  is -1, 0, or 1). This process iterates until the right edge is reached.  
796 For each left-right path, we compute the weighted distance, which is the sum of the distance  
797 between consecutive pixels multiplied by a weight  $e^{\alpha_d I}$ , where  $\alpha_d = 20$  is a parameter and  $I$  is  
798 the intensity of the right point. The weight penalizes bright pixels, and encourages the left-right  
799 path to go through dark pixels. The left-right path with minimal weighted distance, or the  
800 shortest path, is selected. The path follows the dark valley spanning from the left edge to the  
801 right edge, as shown in Fig. 4c (dotted red line). The  $z$  values of this shortest path gives the  
802 depth for each point in the  $xy$ -path. A large  $\alpha_d$  ensures that the shortest path follows dark  
803 pixels. But a value too large can lead to distortions of the path due to dark spots from other  
804 branches or noise.

Linked SWC points are placed on the  $xy$ -path. The distance between successive SWC points



is set to

$$\frac{r_1 + r_2}{1 + \alpha_p |r_1 - r_2|},$$

805 where  $r_1, r_2$  are the radii of the two SWC points, and  $\alpha_p = 0.1$  is a factor for adjusting the  
806 distance based on the difference of the radii. When the radii are almost the same, the distance  
807 is roughly the sum of the radii, and the SWC points touch each other. If the radii are quite  
808 different, however, the SWC points are placed closer in order to better reflect the rapid changes  
809 in the diameters along the branch. To avoid overlapping SWC points at the crossing points in  
810 the skeleton, the first and the last SWC points are placed away from the respective end points  
811 of the  $xy$ -path by the radii of the SWC points.

We check the validity of SWC points, remove any invalid ones, and connect adjacent SWC points along the  $xy$ -path. Removal of invalid SWC points may have created a large distance between two consecutive SWC points; in this case, we do not connect them. The criterion is

$$d_{12} > \alpha_{xy}(r_1 + r_2),$$

where  $d_{12}$  is the Euclidian distance in  $xy$  between the two SWC points;  $r_1, r_2$  are the radii; and  $\alpha_{xy} = 2.0$  is a factor. Sharp turns in  $xy$ -path often result from errors in the skeleton due to crossing branches. To avoid this problem, we do not connect the two SWC points if doing so creates a large angle (greater than  $\theta_{thr} = \pi/3$ ) between consecutive lines connecting the SWC points. We also do not connection the SWC points if the  $z$  difference between them is too large, as this often leads to errors in connecting branches far way in  $z$ . The criterion is

$$d_z |z_1 - z_2| > \alpha_{zj} d_{xy} (r_1 + r_2),$$

812 where  $d_z = 0.5 \mu m$  is the distance between successive planes in the stiff stack;  $d_{xy} = 0.065 \mu m$   
813 is the pixel distance in  $xy$ ; and  $\alpha_{zj} = 2.0$  is a factor for adjusting the threshold.

814 The parameters for creating SWC points are listed in Table 3.

## 815 **Checking the validity of an SWC point**

816 The SWC points created from the mask can be incorrect. For example, if some branches are  
817 parallel to each other and are very close, they can be merged in the mask, leading to incorrect  
818 SWC points. Therefore it is important to check the validity of the SWC points and reject  
819 incorrect ones. Since the mask can be imperfect, we check the validity not with the mask but  
820 with the original tiff stack. The main idea is that a valid SWC point should sit on the centerline  
821 of a valley in the plane at the depth of the SWC point.

822 Consider an SWC point at  $(x_p, y_p, z_p)$  with radius  $r_p$ . The validity of the point is tested with  
823 the intensity  $I(x, y)$  of pixels in the plane at  $z = z_p$  (Fig. 5a). Ideally, the SWC point should be  
824 at a local center of a valley in  $I(x, y)$  of a dendritic branch. To test this, we create a profile of  
825 intensity along a line through  $(x_p, y_p)$  and at angle  $\theta$  relative to the  $x$ -axis (Fig. 5a), and test the  
826 existence of an inverse peak. The profile is a one-dimensional curve  $I_\theta(d)$  (black line, Fig. 5b),  
827 where  $d$  is the coordinate of a pixel point on the line, with  $(x_p, y_p)$  set as the origin.  $I_\theta(d)$  is  
828 the intensity value at the pixel point. The range of  $|d|$  is limited to  $d_{\max} = \min(r_m, 4r_p)$ . Here  
829  $r_m = 3 \mu m$  is the lower bound for the range. We obtain a smoothed profile  $I_{s,\theta}(d)$  by convolving  
830  $I_\theta(d)$  with a Gaussian filter with  $\sigma_s = 0.3 \mu m$  (green line, Fig. 5b), and detect the inverse peak  
831 in  $I_{s,\theta}$ . We take  $\theta$  to be multiples of  $\pi/8$ . Hence there are 8 profiles (Fig. 5a,c).

832 The existence of an inverse peak in the profile  $I_\theta$  is evaluated relative to the fluctuation level  
833 in  $I_\theta$ . To quantify the fluctuation level, we compute the standard deviation  $\sigma_p$  of the difference  
834  $I_\theta - I_{s,\theta}$  for all points with  $I_{s,\theta} > I_m$ , where  $I_m$  is defined as the  $100(1 - \theta_{th})$  percentile of  $I_{s,\theta}$ .  
835 Here the parameter  $\theta_{th}$  is set to 0.5. This threshold is set such that the points in a potential  
836 inverse peak, which should have low values of  $I_{s,\theta}$  and large differences between  $I_\theta$  and  $I_{s,\theta}$  due  
837 to rapid changes in the profile, do not contribute to and distort the evaluation of the fluctuation  
838 level. We evaluate the existence of an inverse peak in the smoothed profile  $I_{s,\theta}$  using two criteria.  
839 The first criterion ensures that the inverse peak is deep enough. Specifically, we require that  
840 the local minimum of  $I_{s,\theta}$  near  $(x_p, y_p)$  is smaller than a threshold  $I_{th} = I_m - \alpha_{th}\sigma_p$  (gray line,  
841 Fig. 5b), where  $\alpha_{th} = 15$  is a factor. If not, we decide that profile does not contain a valid

842 peak. The second criterion checks that the two flanks of the smoothed profile rise above  $I_m - \sigma_p$   
843 (dotted gray line, Fig. 5b). If not, the inverse peak is invalid.

844 For a valid peak, we determine the width of the peak starting from the minimum of  $I_{s,\theta}$ .  
845 We take a derivative of  $I_{s,\theta}$  and smooth it to get  $dI_s$  (Fig. 5e). Starting from the minimum  
846 point, we trace the negative part of the derivative and record the maximum  $dI_{s-}$  of the  
847 absolute value of  $dI_{s,\theta}$  reached during the tracing. The tracing stops once  $dI_{s-} > \alpha_{deriv}\sigma_p$  and  
848  $|dI_s| < dI_{s-} - \alpha_{deriv}\sigma_p$ . Here  $\alpha_{deriv} = 0.1$  is a factor. This way of stopping ensures that the  
849 tracing picks out the first significant peak in the derivative  $dI_s$  and does not stop because of  
850 small bumps in  $dI_{s,\theta}$ . Similarly, we trace the positive part of  $dI_s$  and record the maximum  $dI_{s+}$   
851 of  $dI_s$ . The stop criterion is  $dI_{s+} > \alpha_{deriv}\sigma_p$  and  $dI_s < dI_{s+} - \alpha_{deriv}\sigma_p$ . The width  $w$  of the  
852 peak is measured as the distances between the positions of  $dI_{s+}$  and  $dI_{s-}$  (black vertical lines,  
853 Fig. 5e). The derivatives of all eight smoothed profiles are shown in Fig. 5f.

854 If none of the profiles have valid inverse peaks, the SWC point is invalid. Otherwise, we  
855 chose the profile with the minimum width among the valid ones, and assign its peak position  
856 as the position  $(x_m, y_m)$  of the SWC point, and set  $r_m = \alpha_r w/2$ , where the factor  $\alpha_r = 0.8$ .  
857 This factor is introduced to match the radii of SWC points with those of the branches according  
858 to subjective judgement. If the distance between the original position  $(x_p, y_p)$  and  $(x_m, y_m)$   
859 exceeds  $\alpha_{shift}r_m$ , where  $\alpha_{shift} = 2$ , then the SWC point has shifted too much, and it is flagged  
860 as invalid. If  $r_m$  is smaller than  $r_{min} = 0.2 \mu\text{m}$  or larger than  $r_{max} = 10 \mu\text{m}$ , the radius of the  
861 SWC point is too small or too large, and the point is invalid.

862 Finally, we check whether the pixels with a radius  $0.5r_m$  from the center are dark enough.  
863 Specifically, we check whether the maximum value of the smoothed profile in the orthogonal  
864 direction (red line, Fig. 5d) to the chosen profile (cyan line, Fig. 5d) within  $0.5r_m$  are smaller than  
865 a threshold (green horizontal line, Fig. 5d), which is set as the maximum smoothed intensity of  
866 the chosen profile at  $r_m$  plus  $\sigma_p$ . If not, the SWC point is invalid. This check ensures that the  
867 SWC points created along edges of thick dendrites or the soma are eliminated.

868 If the SWC point passes all the tests described above, it is judged as valid, and  $(x_m, y_m, z)$

869 and  $r_m$  are set as the new position and radius. The position and radius of the SWC are  
870 thus corrected after the validity check. To ensure that the corrections converge, the checking  
871 procedure is iterated three times with the positions and radius updated. The SWC point is  
872 accepted if it passes the tests all three times. The angle  $\theta$  of the profile denotes the orientation  
873 perpendicular to the branch (red line, Fig. 5a).

874 The parameters used in checking the validity of an SWC point are listed in Table 4.

### 875 **Mark pixels occupied**

876 To avoid creating duplicated SWC points, we mark pixels in the tiff stack in the vicinity of the  
877 existing SWC points as occupied. Before creating a new SWC point, we check whether the pixel  
878 at its center is marked as occupied; if so, the SWC point is not created.

879 The marked pixels around two connected SWC points  $(x_1, y_1, z_1, r_1)$  and  $(x_2, y_2, z_2, r_2)$  are in  
880 a volume formed by two half cylinders with radii  $\alpha_{occ}r_1$  and  $\alpha_{occ}r_2$ , respectively, and a trapezoidal  
881 prism that fits with the half cylinders (Fig. 6). Here  $\alpha_{occ} = 1$  is a parameter for adjusting the  
882 extent of exclusion in  $xy$ . The  $z$  extent of the marked volume is large enough to contain the two  
883 SWC points: the distances from the top and bottom planes of the volume to the nearest SWC  
884 points are set to the maximum of  $\alpha_{occ}r_1$ ,  $\alpha_{occ}r_2$ , or  $z_{occ} = 2 \mu\text{m}$ . Increasing the volume of the  
885 marked pixels prevents creations of spurious SWC points. However, if the volume is too large,  
886 correct SWC points can be eliminated, especially when branches are close to each other. These  
887 opposing constraints should guide the choice of the appropriate size for the volume.

888 The parameters for marking pixels occupied are in Table 5.

### 889 **Thick dendrites and the soma**

890 Thick dendrites and the soma can be missing from the mask created with the valley detectors.  
891 There are two main reasons: (1) their dimensions are much larger than the length scale of the  
892 valley detectors; (2) the intensities of the pixels inside them are uniform. Consequently, only  
893 the pixels at their boundaries show up in the mask. This leads to the error of no SWC points

894 for these structures. To correct this problem, we check the existence of thick dendrite and the  
895 soma in each tiff stack. The check is based on the observation that these structures are typically  
896 well stained and the pixels in them are very dark.

897 Specifically, we create and compare two 2D projections of the tiff stack. In the first one, we  
898 only project the pixels that are marked occupied because they are in the vicinity of the existing  
899 SWC points. We enlarge the marked volume by increasing  $\alpha_{occ}$  and  $z_{occ}$  to three times of the  
900 original values. This is to ensure that all pixels associated with the dendrites already covered  
901 the SWC points, including the shadows the dendrites in the out-of-focus planes, and completely  
902 marked. From this 2D projection we determine a threshold, which is set to the intensity of the  
903 darkest 5% of pixels. This threshold indicates the darkness of the pixels covered by the existing  
904 SWC points.

905 In the second 2D projection, we project only the pixels that are not marked occupied. We  
906 then count the number of pixels that are darker than the threshold determined from the first  
907 2D projection. If this number is larger than the number of pixels in an area  $0.5L_{soma}^2$ , where  
908  $L_{soma} = 3 \mu m$  is the length scale of the soma, we decide that the tiff stack contains thick  
909 dendrite and/or the soma since there are significant number of dark pixels that are uncovered  
910 by the SWC points.

911 To place SWC points on thick dendrites and the soma, we create a 2D projection of the tiff  
912 stack with all pixels, smooth it, and create a mask by selecting top  $\theta_{soma} = 0.05$  fraction of  
913 the darkest pixels. From the mask we create SWC points as described before. SWC points are  
914 created only if their positions are not marked occupied by the existing SWC points, using the  
915 original values of  $\alpha_{occ}$  and  $z_{occ}$ .

916 The parameters for creating SWC points for thick dendrites and soma are listed in Table 6.

### 917 **Extending SWC points in 3D**

918 The SWC structures created from the masks are often incomplete, mostly due to the limitations  
919 of the masks in separating nearby branches in 2D projections. These branches could be well

920 separated in the tiff stack although their 2D projections are not; therefore it is useful to extend  
921 the SWC structure using the tiff stack.

922 To minimize the interference from noise, we delete isolated SWC points that are not con-  
923 nected to any other SWC points. To ensure that the extension does not create duplicated SWC  
924 points, we mark pixels nearby the existing SWC points occupied (red circles, Fig. 7a). From an  
925 end SWC point  $(x, y, z, r)$  (yellow circle, Fig. 7a), we search the plane at  $z$  for the candidate for  
926 the next point. To reduce noisy fluctuations, the pixel intensity in the plane is smoothed with a  
927 Gaussian filter with  $\sigma = 2$  pixels. The search is done in a ring area centered at  $(x, y)$ , with inner  
928 and outer radii set to  $\alpha_{min}r$  and  $\alpha_{max}r$  (blue arcs, Fig. 7a), where  $\alpha_{min} = 2.5$  and  $\alpha_{max} = 6$   
929 are the factors determining the range of the ring area. We also restrict the search to a range of  
930 angle ( $\theta_{thr} = \pi/3$ ), where the angle is between the line from a pixel in the ring area to the end  
931 point (black lines, Fig. 7a) and the line from the end point to its connected SWC point (yellow  
932 line, Fig. 7a). The weighted distance is obtained by summing the geometric distance between  
933 consecutive pixel points multiplied by a factor  $e^{\alpha_d I}$ , where  $\alpha_d = 20$  is the factor and  $I$  is the  
934 pixel intensity.

935 We search the potential point for extension along an arc of radius  $r_s$  centered at the end  
936 point and spanning the allowed angle range. We start with  $r_s = \alpha_{min}r$ . We divide the arc  
937 into 64 points, and build a profile of the shortest distances at these points (black line, Fig. 7b).  
938 The profile is smoothed with a Gaussian filter with  $\sigma = 4$  (green line, Fig. 7b). We find the  
939 minimum of the smoothed profile, and take the corresponding pixel point  $(x_c, y_c, z, r)$  as the  
940 candidate SWC point. We then adjust  $z$  of the point by building the profile of pixel intensity  
941 from  $z - z_e$  to  $z + z_e$ , where  $z_e$  is the larger of  $z_b = 2.5 \mu\text{m}$  or  $r$  (black line, Fig. 7c). The  
942 profile is Gaussian smoothed with  $\sigma = 1$  (green line, Fig. 7c). We find the local minimum in the  
943 smoothed profile near  $z$  as the depth of the candidate SWC point  $(x_c, y_c, z_c, r)$ .

944 We test the validity of the candidate SWC point, which also adjusts  $x_c, y_c$  and  $r_c$ . This  
945 process of adjusting  $z_c$  and testing validity is done three times to ensure the convergence of  
946  $x_c, y_c, z_c, r_c$ . If the validity is confirmed all three times, we check whether  $x_c, y_c, z_c$  is marked

947 occupied. If not, a new SWC point  $(x_c, y_c, z_c, r_c)$  is created and connected to the end point. The  
948 extension process then continues from the new SWC point as the end point. If the candidate  
949 point is marked occupied, the extension stops; we find the existing SWC point nearest to the  
950 candidate point, and if the difference in  $z$  is not too large as described previously, we connect  
951 the nearest point to the end point.

952 If the candidate point fails the validity test, we increase the radius  $r_s$  of the arc by 2 pixels  
953 or  $(\alpha_{max}r - \alpha_{min}r)/10$ , whichever is larger, and repeat the search process. This increase of  $r_s$   
954 stops when  $r_s$  reaches  $\alpha_{max}r$ .

955 The parameters used in extending SWC points are listed in Table 7.

## 956 **Connecting end points**

957 After extending SWC points in 3D, a continuous branch can still be represented with broken  
958 segments of SWC points, especially if the underlying signal is weak or there are closely crossing  
959 branches (Fig. 2b,c). We connect these segments with heuristic rules to recover the branch  
960 continuity. To do so, we compute the Euclidean distance between all pairs of end points that  
961 are not connected and the differences in  $z$  are within the allowed range as described before. If  
962 the distance of the pair in  $xy$  is smaller than  $1.5(r_1 + r_2)$ , where  $r_1, r_2$  are the radii, they are  
963 judged to be close to each other and are connected.

964 After connecting the nearby pairs, we consider more distant ones. If the two end points are  
965 within  $\alpha_{xy}(r_1 + r_2)$  in  $xy$ , where  $\alpha_{xy} = 2$  is a factor; and if the angles between the two lines,  
966 linking the end points to their respective connected SWC points, is smaller than  $\theta_{thr} = \pi/3$ ;  
967 then the two points are preserved in the candidate pool for potential connections (see the section  
968 for create SWC points from  $xy$ -paths for these criteria). We then iteratively connect the pairs  
969 of end points in the pool, connecting the closest available pairs first. Once connected, the end  
970 points are excluded from further connections. This pairwise connection stops if the pairs are all  
971 considered or if further connections create loops in the SWC structure.

972 The results for our example tiff stack are shown in Fig. 8.

### 973 **Subdividing tiff stack in $z$**

974 The 2D projection can be complicated when there are many branches in one stack. This often  
975 leads to occlusions in the 2D projection and missed branches in the reconstruction. One way  
976 of mitigating this problem is to divide the tiff stack in  $z$  into  $n_{div}$  slabs with equal heights in  
977  $z$ . We create SWC points separately for each slab. When creating the 2D projection for a  
978 slab, we include extra volume in  $z$  by extending the height in both directions by  $z_{ext} = 5 \mu\text{m}$ .  
979 This is useful for getting good projections of branches that are near the dividing planes between  
980 the slabs. The  $z$ -image also includes the extended volume. Any SWC points whose depths are  
981 beyond the slab boundary are deleted. The extension from the end points are done with the  
982 entire tiff stack, which helps to connect SWC points that belong to the same branch but are cut  
983 by the subdivision. In our example neuron, we set  $n_{div} = 8$ .

984 The parameters of subdivision are listed in Table 8.

### 985 **Combining SWCs for the entire neuron**

986 The image of an entire neuron consists of multiple tiff stacks stitched together (Fig. 10a). The  
987 coordinates of the stacks relative to the first stack are determined during the stitching. For each  
988 stack we obtain the SWC structure, and shift the positions of the SWC points by the relative  
989 coordinates of the stack. The SWC points of individual stacks are read-in sequentially. To  
990 avoid duplicated SWC points in the overlapping regions of adjacent stacks, pixels near the SWC  
991 points that are already created are marked occupied by setting the parameters  $z_{occ}$  5 times of  
992 the usual value and  $r_{occ}$  2 times. If the position of SWC points are at the marked pixels, they  
993 are deleted. For individual stacks, the step of connecting the end points is omitted. Instead,  
994 after reading in the SWC points of all stacks, we extend the SWC points from the end points,  
995 and then connect the new end points. To eliminate noise, we delete very short leaf branches  
996 in the SWC structure (those that have fewer than  $n_{dmin} = 3$  SWC points). In addition, we  
997 eliminate isolated branches that have fewer than  $n_{imin} = 5$  SWC points. Increasing this number  
998 reduces noise in the reconstruction, but can also delete some of the correct reconstruction. The



999 reconstructed SWC structure for the example neuron is shown in Fig. 10b-d.

1000 The parameters are listed in Table 9.

## 1001 References

1002 Brown KM, Barrionuevo G, Canty AJ, De Paola V, Hirsch JA, Jefferis GSXE, Lu J, Snippe  
1003 M, Sugihara I, Ascoli GA (2011) The DIADEM data sets: representative light microscopy  
1004 images of neuronal morphology to advance automation of digital reconstructions. *Neuroinfor-*  
1005 *matics* 9:143–57.

1006 Danielsson PE (1980) Euclidean distance mapping. *Computer Graphics and image process-*  
1007 *ing* 14:227–248.

1008 Feng L, Zhao T, Kim J (2015) neutube 1.0: a new design for efficient neuron reconstruction  
1009 software based on the swc format. *eneuro* 2:ENEURO–0049.

1010 Frangi AF, Niessen WJ, Vincken KL, Viergever MA (1998) Multiscale vessel enhancement  
1011 filtering In *International Conference on Medical Image Computing and Computer-Assisted*  
1012 *Intervention*, pp. 130–137. Springer.

1013 Gidon A, Segev I (2012) Principles governing the operation of synaptic inhibition in dendrites.  
1014 *Neuron* 75:330–341.

1015 Gillette TA, Brown KM, Ascoli GA (2011) The DIADEM metric: comparing multiple recon-  
1016 structions of the same neuron. *Neuroinformatics* 9:233–45.

1017 Gillette TA, Brown KM, Svoboda K, Liu Y, Ascoli GA (2011) DIADEMchallenge.Org: A  
1018 Compendium of Resources Fostering the Continuous Development of Automated Neuronal  
1019 Reconstruction. *Neuroinformatics* 9:303–304.

1020 Graham RL, Hell P (1985) On the history of the minimum spanning tree problem. *Annals of*  
1021 *the History of Computing* 7:43–57.

- 1022 Hamill OP, Marty A, Neher E, Sakmann B, Sigworth F (1981) Improved patch-clamp tech-  
1023 niques for high-resolution current recording from cells and cell-free membrane patches. *Pflügers*  
1024 *Archiv European journal of physiology* 391:85–100.
- 1025 Henze DA, Cameron WE, Barrionuevo G (1996) Dendritic morphology and its effects on the  
1026 amplitude and rise-time of synaptic signals in hippocampal CA3 pyramidal cells. *The Journal*  
1027 *of comparative neurology* 369:331–44.
- 1028 Jaeger D (2001) Accurate reconstruction of neuronal morphology. *Computational neuroscience:*  
1029 *Realistic modeling for experimentalists* pp. 159–178.
- 1030 Krichmar JL, Nasuto SJ, Scorcioni R, Washington SD, Ascoli Ga (2002) Effects of den-  
1031 dritic morphology on CA3 pyramidal cell electrophysiology: a simulation study. *Brain re-*  
1032 *search* 941:11–28.
- 1033 Lankton S (2009) Sparse Field Methods - Technical Report. *Georgia Institute of Technology*  
1034 *Techniacal Report* .
- 1035 Liu Y (2011) The DIADEM and beyond. *Neuroinformatics* 9:99–102.
- 1036 Mainen ZF, Sejnowski TJ (1996) Influence of dendritic structure on firing pattern in model  
1037 neocortical neurons. *Nature* 382:363–366.
- 1038 Menon V, Musial TF, Liu A, Katz Y, Kath WL, Spruston N, Nicholson DA (2013) Balanced  
1039 synaptic impact via distance-dependent synapse distribution and complementary expression of  
1040 ampars and nmdars in hippocampal dendrites. *Neuron* 80:1451–1463.
- 1041 Narayanaswamy A, Wang Y, Roysam B (2011) 3-D image pre-processing algorithms for im-  
1042 proved automated tracing of neuronal arbors. *Neuroinformatics* 9:219–31.
- 1043 Parekh R, Ascoli Ga (2013) Neuronal morphology goes digital: a research hub for cellular and  
1044 system neuroscience. *Neuron* 77:1017–38.

- 1045 Peng H, Bria A, Zhou Z, Iannello G, Long F (2014) Extensible visualization and analysis for  
1046 multidimensional images using Vaa3D. *Nature protocols* 9:193–208.
- 1047 Peng H, Hawrylycz M, Roskams J, Hill S, Spruston N, Meijering E, Ascoli GA (2015) BigNeuron:  
1048 large-scale 3d neuron reconstruction from optical microscopy images. *Neuron* 87:252–256.
- 1049 Sholl DA (1953) Dendritic organization in the neurons of the visual and motor cortices of the  
1050 cat. *Journal of anatomy* 87:387.
- 1051 Stuart G, Spruston N (1998) Determinants of voltage attenuation in neocortical pyramidal  
1052 neuron dendrites. *The Journal of neuroscience* 18:3501–3510.
- 1053 Svoboda K (2011) The past, present, and future of single neuron reconstruction. *Neuroinfor-*  
1054 *matics* 9:97–8.
- 1055 Turaga SC, Murray JF, Jain V, Roth F, Helmstaedter M, Briggman K, Denk W, Seung HS  
1056 (2010) Convolutional networks can learn to generate affinity graphs for image segmentation.  
1057 *Neural computation* 22:511–538.
- 1058 Türetken E, González G, Blum C, Fua P (2011) Automated reconstruction of dendritic and  
1059 axonal trees by global optimization with geometric priors. *Neuroinformatics* 9:279–302.
- 1060 Whitaker RT (1998) A Level-Set Approach to 3D Reconstruction from Range Data. *Interna-*  
1061 *tional Journal of Computer Vision* 29:203–231.
- 1062 Zandt BJ, Losnegård A, Hodneland E, Veruki ML, Lundervold A, Hartveit E (2017) Semi-  
1063 automatic 3d morphological reconstruction of neurons with densely branching morphology: Ap-  
1064 plication to retinal aii amacrine cells imaged with multi-photon excitation microscopy. *Journal*  
1065 *of neuroscience methods* 279:101–118.
- 1066 Zhang TY, Suen CY (1984) A fast parallel algorithm for thinning digital patterns. *Communi-*  
1067 *cations of the ACM* 27:239–242.

- 1068 Zhou Z, Sorensen S, Zeng H, Hawrylycz M, Peng H (2015) Adaptive image enhancement for  
1069 tracing 3d morphologies of neurons and brain vasculatures. *Neuroinformatics* 13:153–166.
- 1070 Zitova B, Flusser J (2003) Image registration methods: a survey. *Image and vision comput-*  
1071 *ing* 21:977–1000.

1072 **Figure Legends**

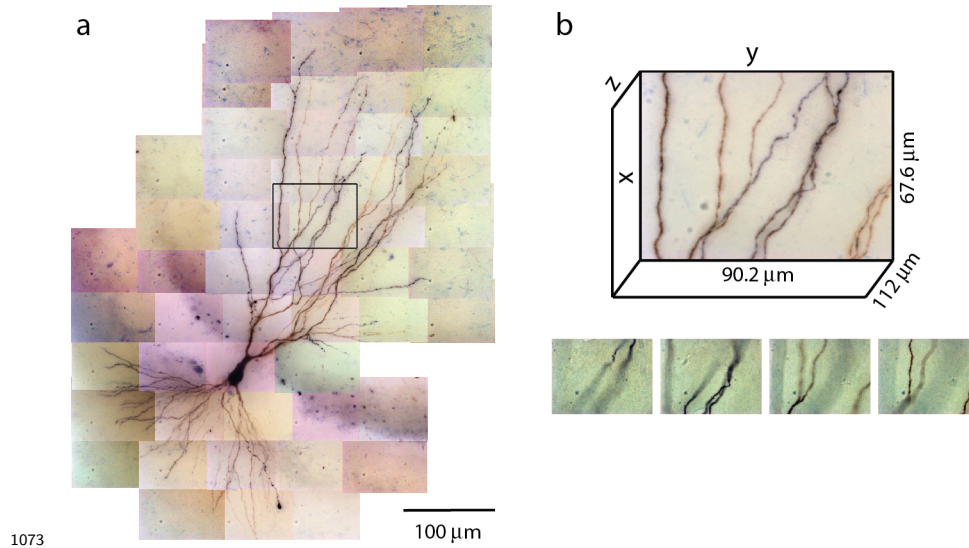

1074 Figure 1: Tiles of tiff stacks covering the entire neuron. a. A mouse CA3 neuron imaged at 100X,  
1075 NA 1.4. There are 51 tiles covering the entire neuron. 2D projection is shown. b. Dimensions  
1076 of one tile. Each tiff stack consists of 224 planes of images. The distance between successive  
1077 image planes is  $0.5 \mu\text{m}$ . Four planes at different depths in the tiff stack indicated by the black  
1078 rectangle in (a) are shown below.

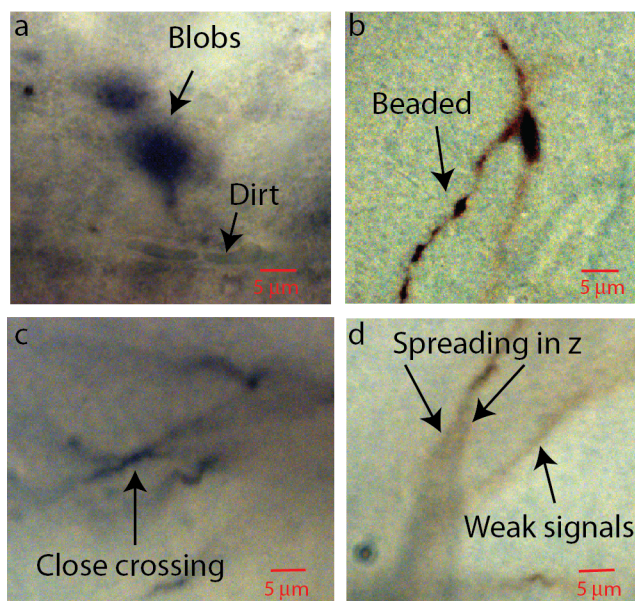

1080

1081 Figure 2: Aspects of bright-field images of biocytin-filled neurons that makes automatic recon-  
1082 struction challenging. Parts of images in single planes of the tiff stacks are shown. a. Biocytin  
1083 can be spilled and create spurious signals. Dirt or dust can also add noise. b. Thin branches  
1084 can be broken into “beads”. c. Close crossing between adjacent neuron branches. d. A branch  
1085 can cast bifurcating shadows in  $z$  with darkness level comparable to weak signals from nearby  
1086 faint branches.

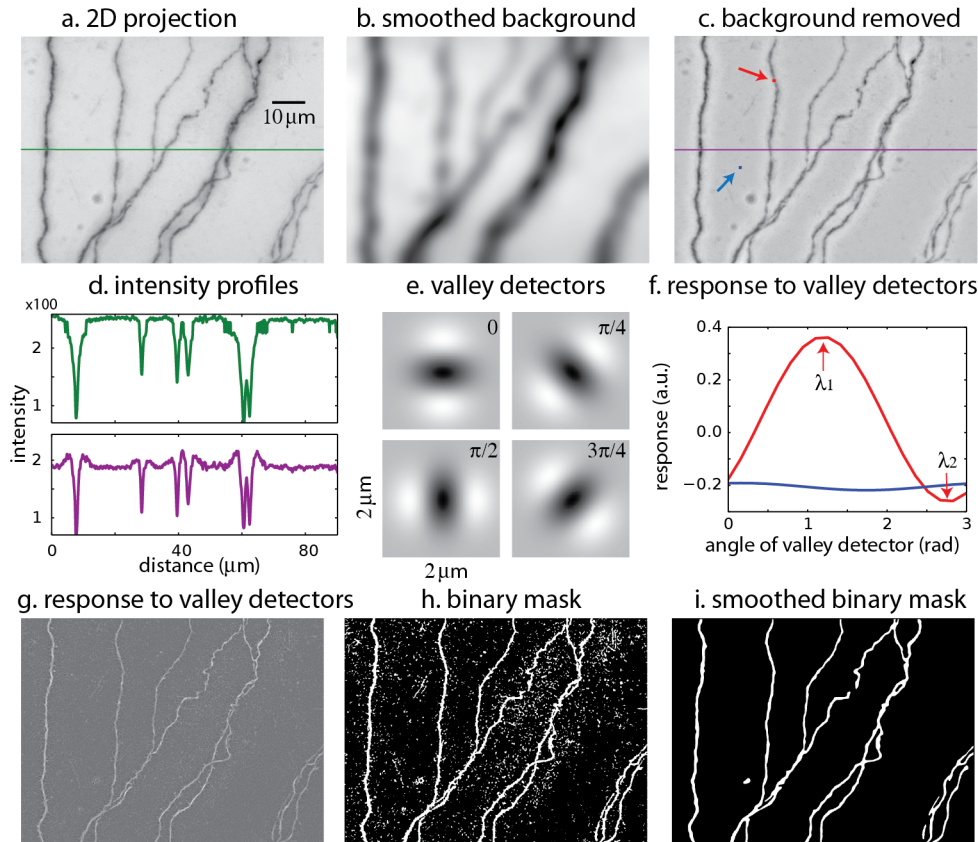

1088

1089 Figure 3: The process of creating a binary mask from 2D projection. a. 2D projection from the  
 1090 image stack. The intensity profile across the green line is shown in (d). b. Smoothed background  
 1091 obtained from Gaussian smoothing of the 2D projection. c. 2D projection after removing the  
 1092 smoothed background. The intensity across the purple line is shown in (d). The red and blue  
 1093 arrows indicate the points to be tested with valley detectors in (f). d. Intensity across the midline  
 1094 in the original 2D projection (green line in (a)) and after removal of the background (purple line  
 1095 in (c)). e. Images of valley detectors at four orientations. f. Responses to valley detectors at  
 1096 varying orientations for two points shown in c (red point, red line; blue point, blue line).  $\lambda_1$  and  
 1097  $\lambda_2$  are the maximum and minimum responses, respectively. g. The maximum responses to the  
 1098 valley detectors ( $\lambda_1$ ) for all pixels. h. The binary mask obtained from thresholding  $\lambda_1$ . i. The  
 1099 smoothed binary mask.

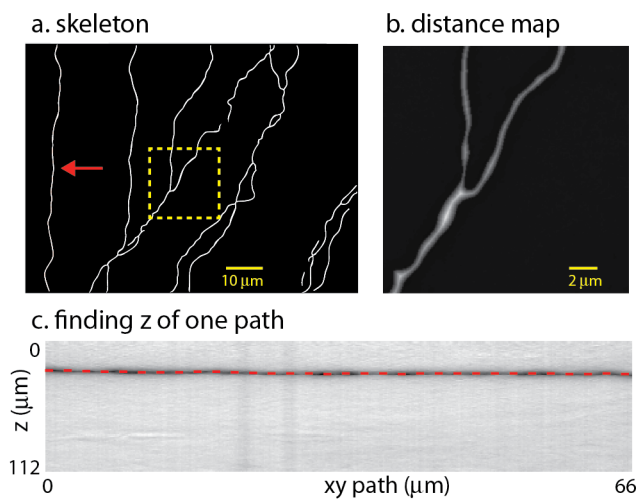

1101

1102 Figure 4: Creating SWC structure from the mask. a. The skeleton obtained by thinning the  
1103 mask. b. Distance map computed from the mask. The square region highlighted in (a) is shown.  
1104 The brightness of each pixel is proportional to the distance to the nearest boundary in the mask.  
1105 c. Finding the depth of the path. The image is constructed by cutting through the stack in  $z$ -  
1106 dimension following the  $xy$  path indicated by the arrow in (a). The dark band is the neurite  
1107 along the path. The dotted line is the depth ( $z$ ) computed using the left-right shortest path  
1108 algorithm.



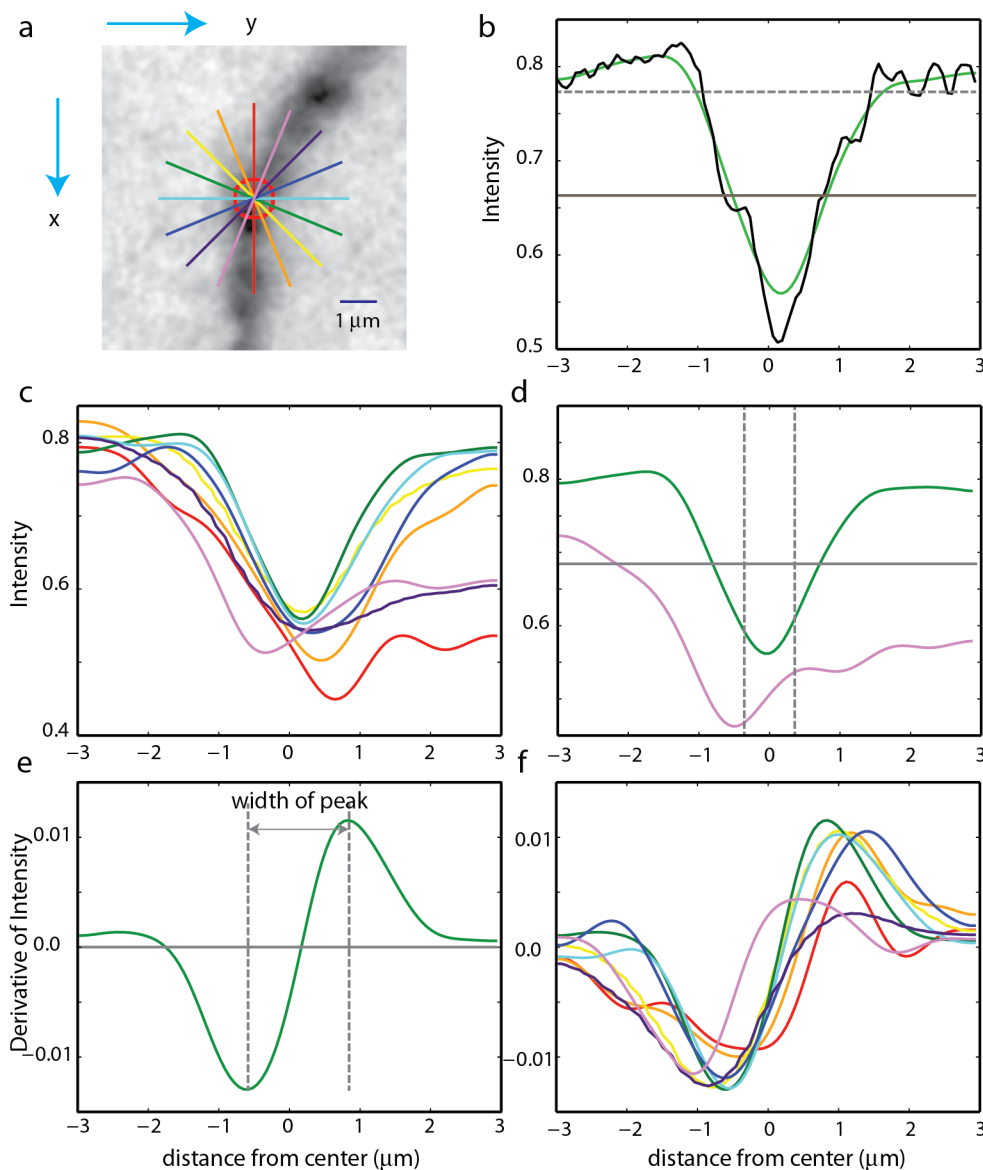

1110

1111 Figure 5: Checking the validity of an SWC point. a. A patch of image around an SWC point to  
 1112 be examined. The image is taken from the  $z$ -plane of the SWC point. Profiles of the intensities  
 1113 along eight directions are taken (straight lines; colors indicate angles). The green line is the  
 1114 profile chosen to adjust the SWC point. The red circle indicates the radius of the SWC point.  
 1115 b. The profile (black, raw; green, smoothed) along the green line in (a). The dotted gray line  
 1116 is the baseline, and the solid gray line is the threshold. An inverse peak is judged valid if the  
 1117 flanks of the smoothed profile go above the baseline, and the minimum value goes below the  
 1118 threshold. c. Smoothed profiles at all eight directions. d. The chosen profile (green) and the  
 1119 profile at the orthogonal direction (violet). The vertical lines are at the half radius points. Note  
 1120 that the center of the profiles are slightly shifted compared to those in (c). For the SWC to  
 1121 be valid, the minimum intensity of the profile at the orthogonal direction must be below the  
 1122 threshold (gray line) within the vertical lines. e. Smoothed derivative of the smoothed profile  
 1123 in (b). The vertical lines indicate the local maxima of the derivatives. The distance between  
 1124 the vertical lines is the width of the peak. f. Smoothed derivatives of the profiles for all eight  
 1125 directions. The profile with the minimum width is chosen.

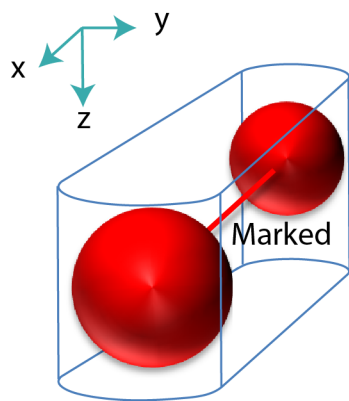

1127

1128 Figure 6: Mark pixels in tiff stack occupied. The pixels around two connected SWC points (red  
1130 spheres), formed by two half cylinders and a trapezoidal prism, are marked as occupied.

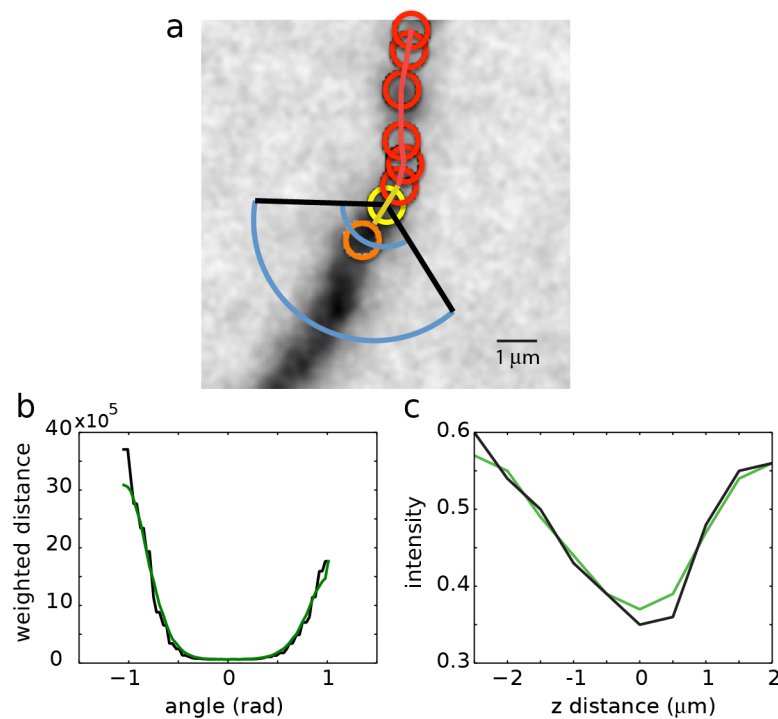

1131

1132 Figure 7: Extending SWC structure in 3D. a. The candidate point for extension is searched  
1133 in the plane of an end SWC point (yellow circle). Red circles are the SWC points that are  
1134 connected to the end point. The search is restricted to the pixels in the area enclosed by the two  
1135 blue arcs and two black lines. The intensity-weighted shortest distances from the end point to  
1136 pixels in the search area are computed. b. The profile of the shortest distances along the inner  
1137 arc (black line in in (a)). The green line is the smoothed version. The angle is measured relative  
1138 to the line connecting the end point to its connected SWC point (yellow line in (a)). The angle  
1139 at the minimum value of the smoothed profile is selected as the position for the candidate point  
1140 (orange circle in (a)). c. The depth of the candidate point is adjusted using the intensity profile  
1141 in  $z$  at the  $xy$  position of the candidate point (black line). The point of minimum intensity in  
1142 the smoothed profile (green line) is set as the depth of the candidate point. The  $z$  distance in  
1143 the graph is relative to the  $z$  position of the end point.

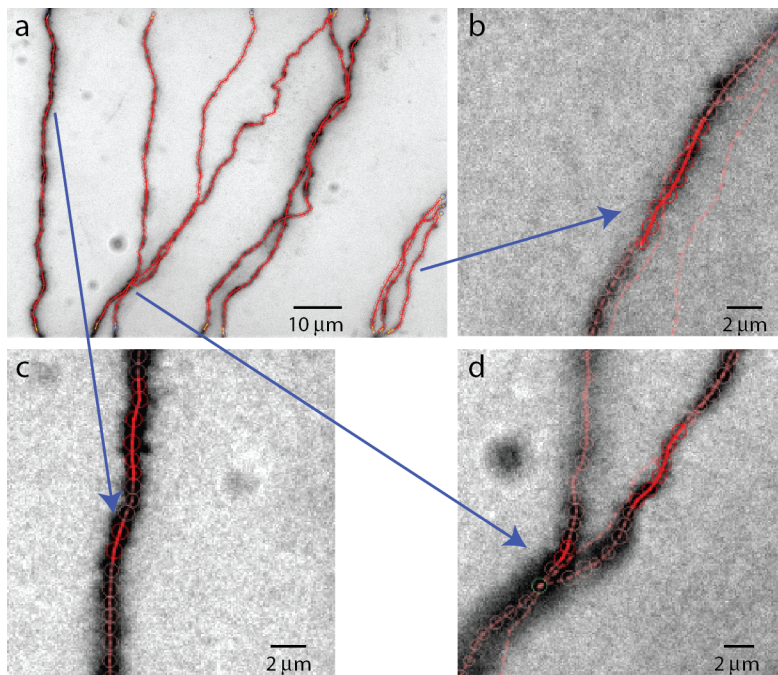

1145

1146 Figure 8: The SWC structure overlaid on the image. a. The SWC structure projected on to the  
1147 image of 2D projection. Red circles are SWC points. Connections between them are indicated  
1148 with red lines. b-d. SWC structure overlaid at the specific planes in the tiff stack, zoomed in to  
1149 show more details. Arrows indicate the corresponding regions in the 2D projection.

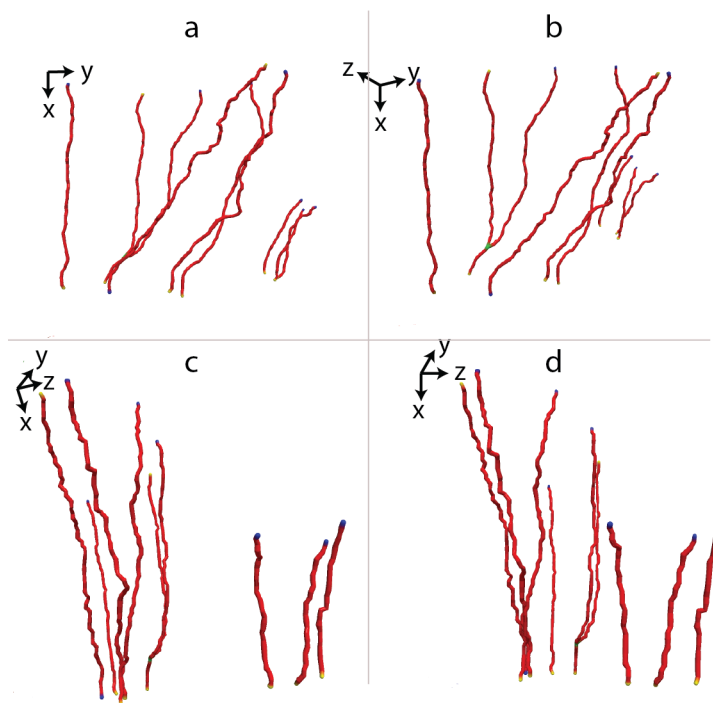

1151

1152 Figure 9: The SWC structure viewed from four different angles to reveal the 3D structure.  
1153 The viewing angles are indicated with the directions of  $xyz$  coordinates. The view angle in (a)  
1154 corresponds to the 2D projection view.

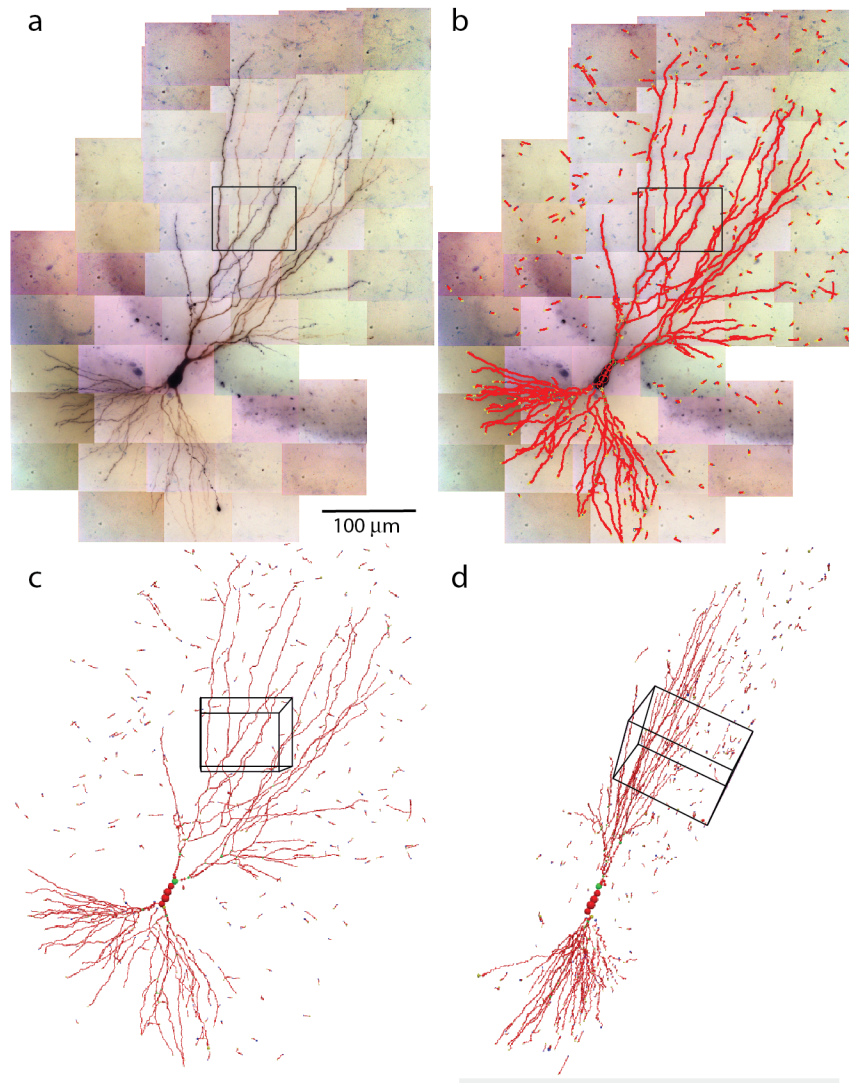

1156

1157 Figure 10: Combining SWCs from the stacks for the entire neuron. a. 2D projection of the entire  
1158 neuron. Individual tiff stacks are stitched together to obtain their relative coordinates. The  
1159 stack in Fig.9 is highlighted with a black rectangle. b. The SWC of the entire neuron is obtained  
1160 by combining the SWCs of individual tiff stacks. The SWC points are overlaid onto the 2D  
1161 projection. c. 3D view of the SWC structure. The 3D box corresponds to the highlighted stack  
1162 in (a). d. The 3D view from a different angle.

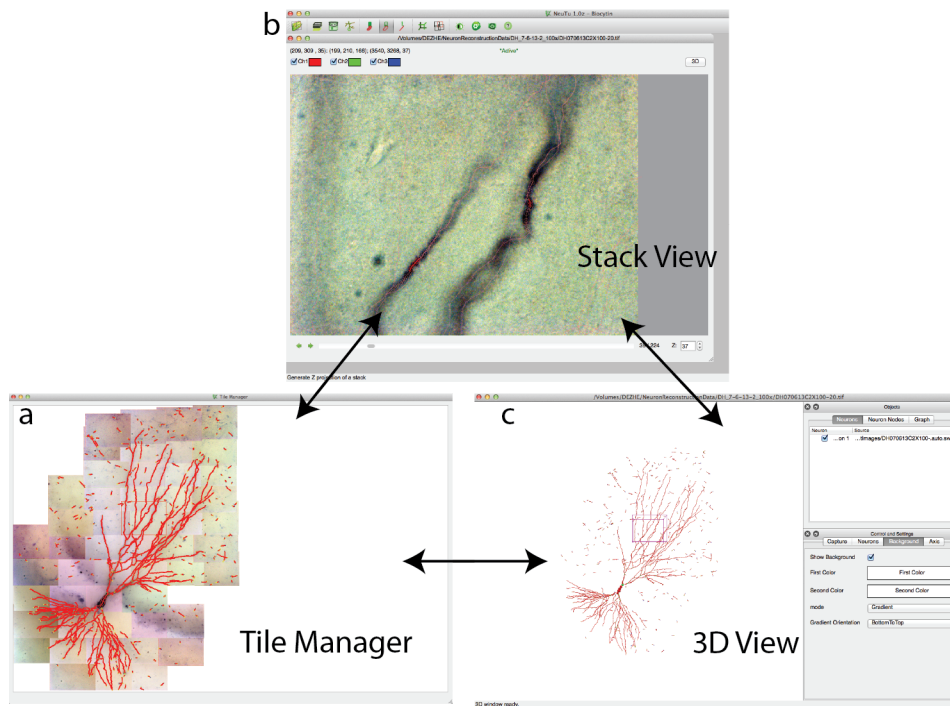

1164

1165 Figure 11: Three views for examining the SWC structure. a. Tile manager. 2D projection of  
1166 the stitched stacks is superimposed with the 2D projection of the SWC structure. b. Stack  
1167 view. One stack is loaded, with the SWC points in the stack overlaid onto the image. The 2D  
1168 projection view of the stack can be created within this window. c. SWC view. The 3D structure  
1169 can be viewed from different angles and edited.

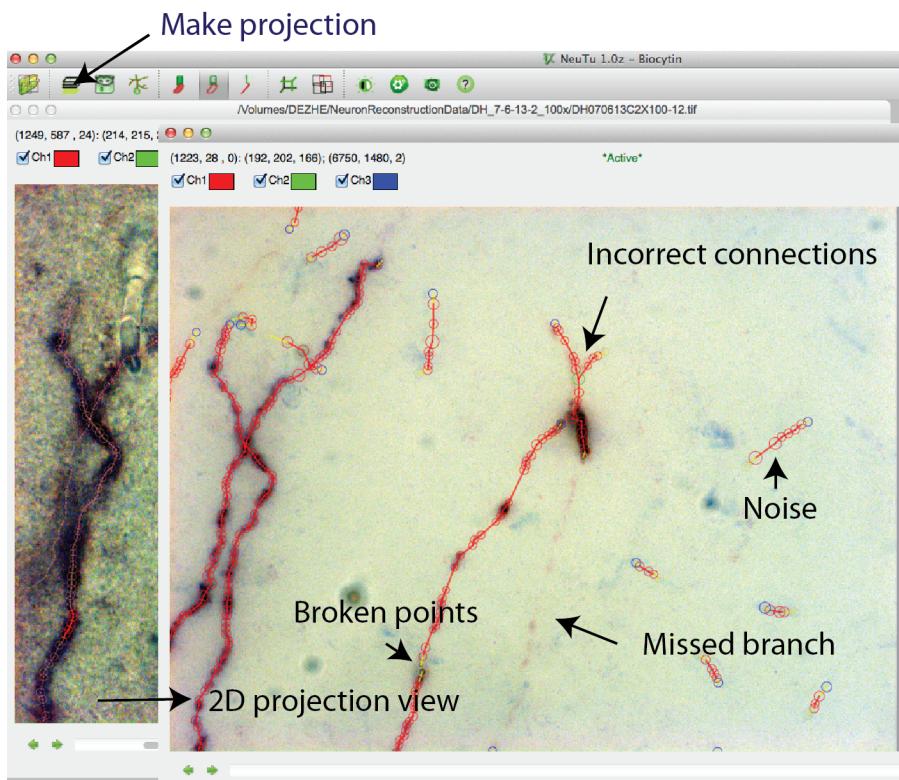

1172 Figure 12: In the Stack View, clicking on the Make Projection button creates the 2D projection  
1173 of the tiff stack and the SWC structure. It is easy to spot mistakes in this view. SWC points  
1174 can be removed and their properties changed. The connections between SWC points can be  
1175 modified. Selecting one SWC point and pressing z locates the points in the Stack View for  
1176 further examination and modification.



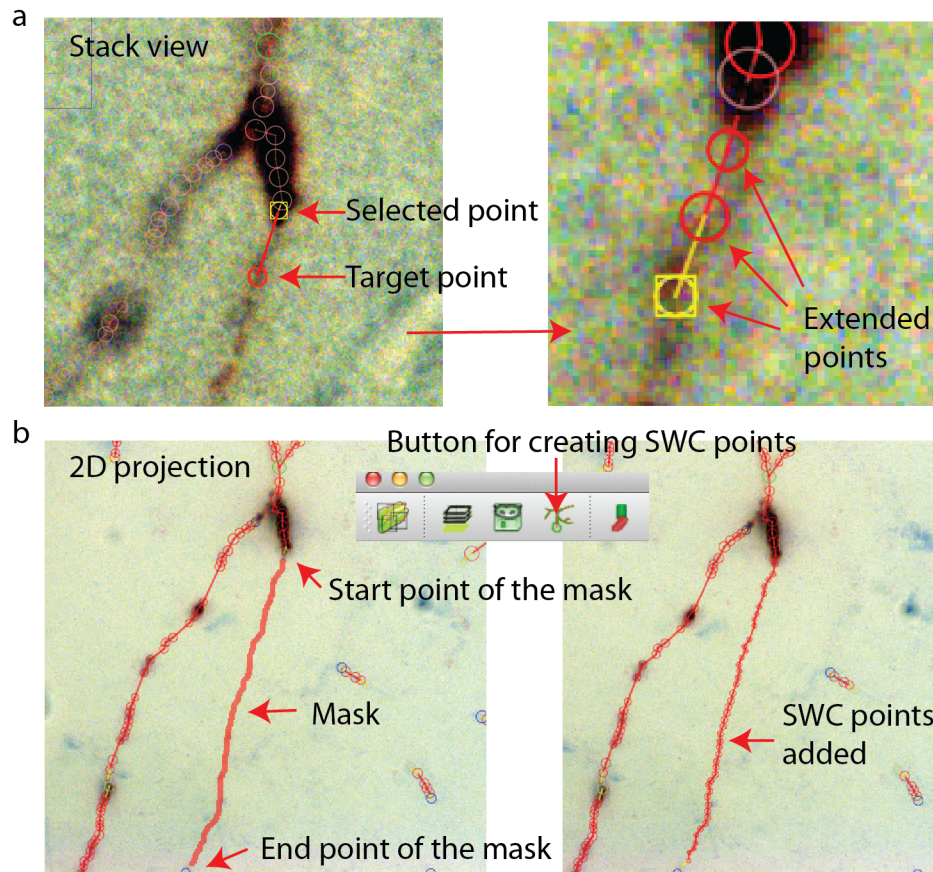

1178

1179 Figure 13: Creating SWC points. a. In Stack View, an SWC point is selected. Find the target  
1180 point by finding the focus plane of the branch. Clicking on the target point creates SWC points  
1181 connecting the target point to the selected point along the branch. b. In Projection View,  
1182 pressing **r** starts mask creation. Click on the starting point and **Shift-click** on the end point  
1183 along a branch creates a mask. Clicking on the Mask → SWC button creates SWC points along  
1184 the mask.

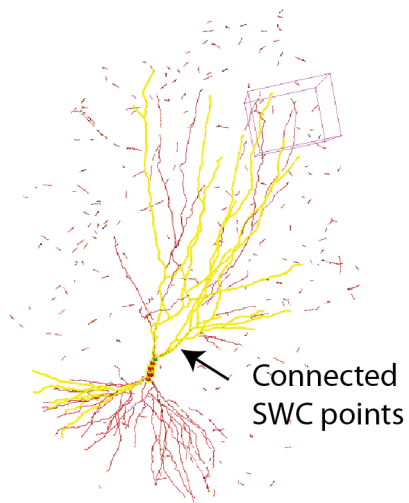

1186

1187 Figure 14: In 3D View, selecting one SWC point and pressing **s-4** selects all SWC points  
1188 connected to the selected. This operation is useful for detecting broken connections.

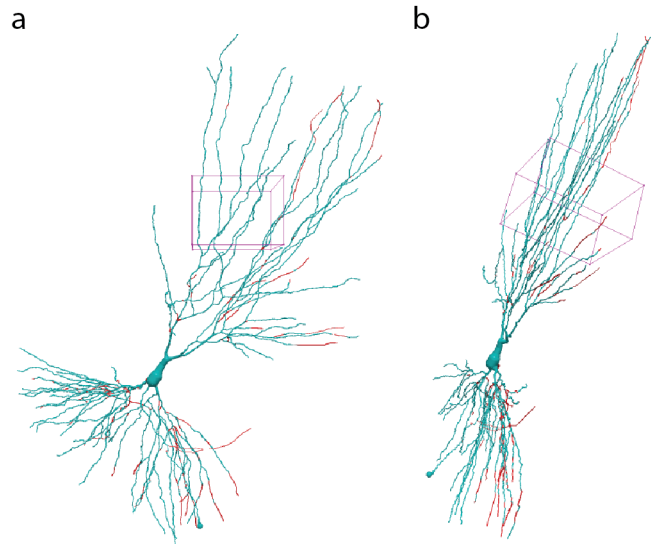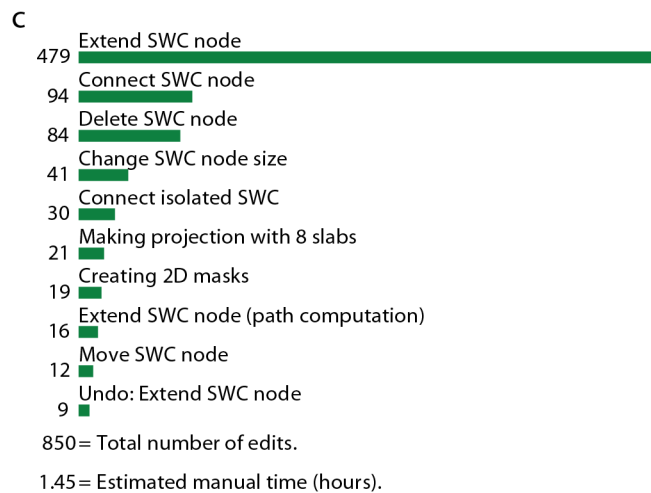

1190

1191 Figure 15: Reconstructed neuron after editing. a,b. Two different views of the reconstructed  
1192 neurons. The SWC points from the automatic reconstruction are in blue, and those added in  
1193 the editing process are in red. c. Top ten operations done in the editing process and the total  
1194 number of edits.  
1195

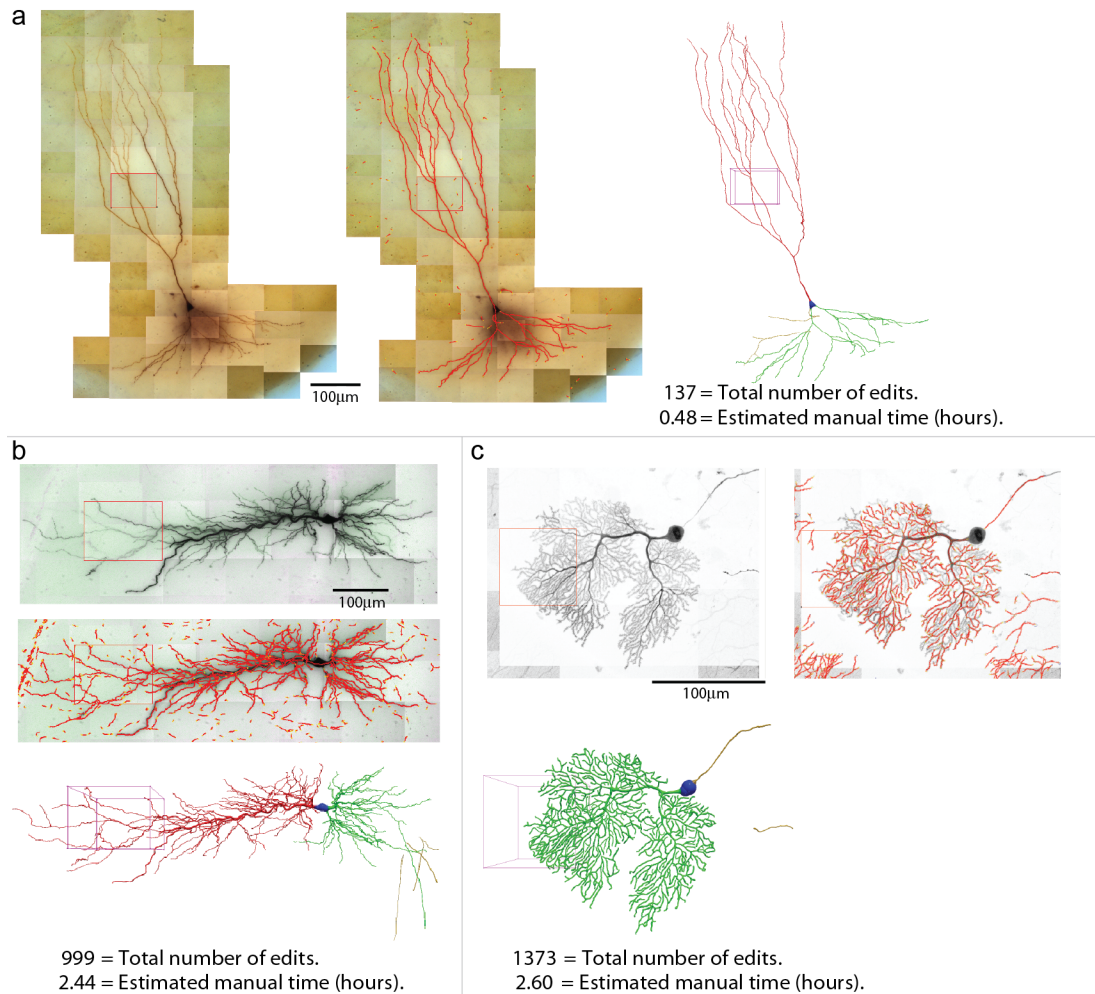

1196

1197 Figure 16: Three examples of reconstructions. Shown for each neuron are the 2D projection of  
1198 the images, automated reconstruction on top of the 2D projection, and the final reconstruction  
1199 (blue, soma; red, apical dendrite; green, basal dendrite; gold, axon). a. A pyramidal neuron in  
1200 the mouse CA3 region imaged at 100X (biocytin). b. A pyramidal neuron in the rat CA1 region  
1202 imaged at 63X (biocytin). c. A mouse Purkinje cell imaged at 63X with confocal microscope.

1203 **Tables**

| Parameter  | Value               | Meaning                              |
|------------|---------------------|--------------------------------------|
| $d_{xy}$   | 0.065 $\mu\text{m}$ | pixel distance in xy                 |
| $d_z$      | 0.5 $\mu\text{m}$   | z-distance between successive planes |
| $\sigma_b$ | 2 $\mu\text{m}$     | length scale for smooth background   |

Table 1: Parameters for tiff stacks and 2D projections.

| Parameter        | Value               | Meaning                                |
|------------------|---------------------|----------------------------------------|
| $\sigma$         | 0.1 $\mu\text{m}$   | length scale of valley detector        |
| $\alpha_\lambda$ | 10                  | factor for eliminating circular blobs  |
| $f_\lambda$      | 0.1                 | fraction for determining the threshold |
| $\mu$            | 0.1                 | parameter for level set smoothing      |
| $N_{levelset}$   | 500                 | number of level set iterations         |
| $A_s$            | 1.0 $\mu\text{m}^2$ | threshold for small areas removed      |

Table 2: Parameters for creating the binary mask.

| Parameter      | Value             | Meaning                                                       |
|----------------|-------------------|---------------------------------------------------------------|
| $l_{sm}$       | 0.5 $\mu\text{m}$ | smallest length of xy-path used                               |
| $\alpha_d$     | 20                | factor for weighting distance between pixels                  |
| $\alpha_p$     | 0.1               | factor for decreasing distance between consecutive SWC points |
| $\alpha_{xy}$  | 2                 | factor for disconnecting two consecutive SWC points           |
| $\theta_{thr}$ | $\pi/3$           | maximum angle allowed between consecutive lines               |
| $\alpha_{zj}$  | 2                 | factor for z jump threshold                                   |

Table 3: Parameters for creating SWC points from 2D mask.

| Parameter        | Value             | Meaning                                                   |
|------------------|-------------------|-----------------------------------------------------------|
| $r_m$            | $3 \mu\text{m}$   | lower bound for the range of the profiles                 |
| $\sigma_s$       | $0.3 \mu\text{m}$ | length scale for smoothing profiles                       |
| $\theta_{th}$    | 0.5               | fraction for determining the threshold for peak           |
| $\alpha_{th}$    | 15                | factor for determining the threshold for peak             |
| $\alpha_{deriv}$ | 0.1               | factor for determining the stop criterion for derivatives |
| $\alpha_{shift}$ | 2                 | factor for allowing shifts in the position                |
| $r_{min}$        | $0.2 \mu\text{m}$ | lower bound for the radius                                |
| $r_{max}$        | $10 \mu\text{m}$  | upper bound for the radius                                |
| $\alpha_r$       | 0.8               | factor for adjusting the radius                           |

Table 4: Parameters for checking validity of an SWC point.

| Parameter      | Value           | Meaning                                          |
|----------------|-----------------|--------------------------------------------------|
| $\alpha_{occ}$ | 1               | factor for adjusting radius of the marked volume |
| $z_{occ}$      | $2 \mu\text{m}$ | lower bound for extend of the volume in z        |

Table 5: Parameters for marking pixels near the SWC points occupied.

| Parameter       | Value           | Meaning                                     |
|-----------------|-----------------|---------------------------------------------|
| $L_{soma}$      | $3 \mu\text{m}$ | length scale of the soma                    |
| $\theta_{soma}$ | 0.05            | fraction for the threshold of creating mask |

Table 6: Parameters for creating SWC points for thick dendrites and the soma.

| Parameter       | Value             | Meaning                                               |
|-----------------|-------------------|-------------------------------------------------------|
| $\alpha_{smin}$ | 2.5               | factor for the minimum radius of the search area      |
| $\alpha_{smax}$ | 6                 | factor for the maximum radius of the search area      |
| $z_s$           | $2.5 \mu\text{m}$ | the minimum of the range in z for adjusting the depth |

Table 7: Parameters for extending SWC points in 3D.

| Parameter | Value           | Meaning                                         |
|-----------|-----------------|-------------------------------------------------|
| $n_{div}$ | 8               | number of subdivisions                          |
| $z_{ext}$ | $5 \mu\text{m}$ | extension of sub-slabs when creating SWC points |

Table 8: Parameters for subdividing a tiff stack.

| Parameter  | Value | Meaning                                                   |
|------------|-------|-----------------------------------------------------------|
| $n_{dmin}$ | 3     | minimum number of SWC points allowed in leafs             |
| $n_{imin}$ | 5     | minimum number of SWC points allowed in isolated branches |

Table 9: Parameters for reducing noise in SWC structure.
